1 RUNNING HEAD: Intergenerational transmission and methylation

2 Intergenerational transmission of complex traits and the offspring methylome

3

4 Fiona A. Hagenbeek, PhD<sup>1,2,3,\*</sup>, René Pool, PhD<sup>1,2</sup>, Austin J. Van Asselt, BSc<sup>4</sup>, Erik A. Ehli, PhD<sup>4</sup>, Meike  
5 Bartels, PhD<sup>1,2</sup>, Jouke Jan Hottenga, PhD<sup>1,2</sup>, Conor V. Dolan, PhD<sup>1,2</sup>, Jenny van Dongen, PhD<sup>1,2,5,¥</sup>, Dorret  
6 I. Boomsma, PhD<sup>1,2,5,¥</sup>

7

8 <sup>1</sup>Department of Biological Psychology, Vrije Universiteit Amsterdam, Amsterdam, the Netherlands.

9 <sup>2</sup>Amsterdam Public Health (APH) research institute, Amsterdam, the Netherlands.

10 <sup>3</sup>Institute for Molecular Medicine Finland (FIMM), HiLIFE, University of Helsinki, Helsinki, Finland.

11 <sup>4</sup>Avera McKennan Hospital, University Health Center, Sioux Falls, SD, USA.

12 <sup>5</sup>Amsterdam Reproduction & Development (AR&D) research institute, Amsterdam, the Netherlands.

13

14 <sup>¥</sup>These authors share last authorship.

15 \*Correspondence: Fiona A. Hagenbeek ([fiona.hagenbeek@helsinki.fi](mailto:fiona.hagenbeek@helsinki.fi)), Institute for Molecular Medicine  
16 Finland (FIMM), HiLIFE, University of Helsinki, Tukholmankatu 8, 00290, Helsinki, Finland.

17

18 Word count: 3,990

19 N tables: 2, N figures: 2

## 20 Abstract

21 The genetic makeup of parents can directly or indirectly affect their offspring phenotype through  
22 genetic transmission or via the environment that is influenced by parental heritable traits. Our  
23 understanding of the mechanisms by which indirect genetic effects operate is limited. Here, we  
24 hypothesize that one mechanism is via the offspring methylome. To test this hypothesis polygenic  
25 scores (PGSs) for schizophrenia, smoking initiation, educational attainment (EA), social deprivation,  
26 body mass index (BMI), and height were analyzed in a cohort of 1,528 offspring and their parents  
27 (51.5% boys, mean [SD] age = 10 [2.8] years). We modelled parent and offspring PGSs on offspring  
28 DNA methylation, accounting for the own PGS of offspring, and found significant associations  
29 between parental PGSs for schizophrenia, EA, BMI, and height, and offspring methylation sites,  
30 comprising 16, 2, 1, and 6 sites, respectively ( $\alpha = 2.7 \times 10^{-5}$ ). More DNA methylation sites were  
31 associated with maternal than paternal PGSs, possibly reflecting the maternal pre- or  
32 periconceptional environment during critical embryonic development.

33 **Keywords:** Intergenerational transmission, DNA methylation, polygenic scores, genetic nurture,  
34 gene-environment correlation, complex human traits

## 35 Introduction

36 Phenotypic resemblance among parents and their biological offspring can be due to both genetic  
37 and environmental influences, with the genetic contribution to phenotypic resemblance manifesting  
38 through different sources. The first source applies to all heritable phenotypes: the Mendelian  
39 transmission of parental alleles to their offspring, resulting in parents and offspring sharing 50% of  
40 their autosomal alleles. A second source is heritable parental behaviors, which shape the  
41 environment of the offspring. Here, the effect of parental genotype on offspring phenotypes is  
42 mediated by parental traits and behavior, contributing to the offspring environment. This source is  
43 denoted “genetic nurture”, because it implies that nurture – the totality of external factors after  
44 conception influenced or created by parents – may have a genetic component [1, 2]. Hence, genetic  
45 nurture arises from the influence of a heritable parental phenotype on the phenotype of their  
46 offspring, which is also known as vertical transmission [3]. Additional forms of indirect genetic  
47 effects can encompass other forms of cultural transmission, such as, horizontal transmission  
48 between individuals of the same generation, such as siblings [4, 5], and ecological inheritance,  
49 involving the transmission of inherited resources and conditions to descendants through niche  
50 construction [6].

51 Several designs can resolve direct genetic effects (the influence of genotype of the offspring  
52 on own phenotype) and indirect genetic effects (the above-mentioned genetic nurture). These  
53 include multi-generation twin-family designs that infer genetic effects from phenotypic resemblance  
54 among family members [7, 8], designs based on measured genetic information, e.g., polygenic scores  
55 (PGSs) [1, 2, 9, 10], or designs that combine these two [11]. Using PGS designs, robust evidence for  
56 genetic nurture effects in offspring educational attainment (EA) has been found [1, 2, 12].

57 The mechanism through which direct genetic effects (Mendelian inheritance) contribute to  
58 variation in human traits is complex, involving a cascade of transcription and translation of genetic  
59 information [13]. Here, we propose to examine DNA methylation as one possible mechanism

60 through which both direct and indirect genetic effects may act. Epigenetic mechanisms such as DNA  
61 methylation modulate gene expression [14], but are themselves subject to both genetic [15, 16] and  
62 environmental influences [17]. Animal studies have shown that early life environmental exposures  
63 like diet, trauma, and social deprivation can induce epigenetic reprogramming in cells. For example,  
64 a classic study of rats found that the quality of maternal care early in life leads to epigenetic  
65 alterations that affect the behavior of offspring into adulthood [18]. Offspring raised by (non-  
66 biological) less-nurturing mothers exhibit increased anxiety as adults, which is attributed to enduring  
67 changes in DNA methylation in the brain. This study was based on cross-fostering experiments in  
68 which pups born to calm biological dams were raised by anxious adoptive dams, and vice versa, to  
69 separate the effect of the environment provided by the mother from genetic transmission [18].

70 In humans, it is more challenging to disentangle the influence of direct genetic transmission  
71 and indirect genetic effects that operate via the environment created by parents. Comprehensive  
72 reviews of childhood psychological adversity and DNA methylation indicated that childhood  
73 maltreatment and other adversities are associated with differential DNA methylation but called for  
74 further study of the impacts of childhood experiences and the effects of genetic transmission of  
75 parental psychopathology risk [19–21]. In the present study, we propose an approach to disentangle  
76 the influence of direct genetic transmission and indirect genetic effects that operate via the  
77 environment created on DNA methylation, by modelling the effects of parental PGSs and offspring  
78 PGSs on the offspring DNA methylation profile [9, 10]. Finding an effect of parental PGSs, in addition  
79 to the effect of the offspring's own PGS, would support of the hypothesis that genetic nurture acts  
80 through the offspring methylome. We obtained parental and offspring PGSs for six traits:  
81 schizophrenia, smoking initiation, EA, social deprivation, body mass index (BMI), and height in  
82 nuclear twin families. We focused on schizophrenia, EA, BMI, and height because they have high  
83 powered genome-wide association studies (GWAS). We focused on smoking because it evinces a  
84 strong effect of DNA methylation based on prior epigenome-wide association studies (EWAS). We  
85 focused on social deprivation because it is associated with a strong theoretical hypothesis of

86 mediation via epigenetic mechanisms [22]. EWAS have revealed widespread associations of DNA  
87 methylation and schizophrenia [23, 24], smoking [25, 26], and BMI [27, 28]. PGSs for these traits  
88 have been associated with DNA methylation [23, 29–31]. However, to date no studies have  
89 undertaken to separate direct from indirect genetic effects on DNA methylation in offspring, which  
90 requires the PGSs of the offspring and the offspring's parents.

91 In our study, the epigenetic data were available for 1,528 young twins (51.5% boys, mean [SD]  
92 age = 10 [2.8] years). DNA samples for genotyping and polygenic scoring were available for both  
93 children and their parents. DNA methylation was measured by the Illumina Infinium EPIC array,  
94 which measures DNA methylation at approximately 850K sites. To reduce multiple testing burden,  
95 we selected the top 10% most variable probes (72,889). We have shown in an independent sample  
96 of adult Dutch twins that the most variable probes are the most reliable across time, tissue, and  
97 platform [32]. DNA methylation levels in offspring were regressed on offspring, maternal, and  
98 paternal PGSs by linear regression, while correcting for familial clustering.

## 99 **Materials and methods**

### 100 **Study population and procedures**

101 The collection of DNA samples in offspring and their parents was done at home from buccal swabs.  
102 Families were recruited from the Netherlands Twin Register (NTR) [33] and the majority took part in  
103 the ACTION Biomarker Study [34, 35]. We first collected data in a pilot study to assess the suitability  
104 of the Infinium EPIC array for buccal-derived DNA samples [36] in 96 monozygotic (MZ) twins (47  
105 complete pairs, 56.2% boys, mean [SD] (range) age at DNA collection 7.4 [2.4] (1-10) years). Next,  
106 1,141 twins (523 complete pairs, 52.6% boys, mean [SD] (range) age at DNA collection = 9.6 [1.9]  
107 (5.6-12.9) years) and their parents were included in the main ACTION Biomarker Study [37]. A third  
108 dataset included additional twins and siblings in the ACTION Biomarker Study, and MZ twins and  
109 triplets from the NTR, totaling 291 children of 1 to 18 years of age (45.7% boys, mean [SD] age at  
110 DNA collection = 12.1 [4.2] years). DNA methylation data and offspring PGSs were available for all

111 offspring, maternal PGSs were available for 92.1% and paternal PGSs for 81.1% of the offspring, with  
112 parental PGS of both biological parents available for 78.3% of the offspring (**Supplementary Table 1**).  
113 All families were of European ancestry.

114 Parents gave written informed consent for their own and their offspring's participation. The  
115 study was conducted according to the guidelines of the Declaration of Helsinki. The ACTION project  
116 was assessed by the Central Ethics Committee on Research Involving Human Subjects of the VU  
117 University Medical Center, Amsterdam (NTR 03-180, NTR 25th of May 2007, ACTION 2013/41 and  
118 2014.252), an Institutional Review Board certified by the U.S. Office of Human Research Protections  
119 (IRB number IRB00002991 under Federal-wide Assurance FWA00017598).

## 120 Infinium MethylationEPIC BeadChip

121 DNA methylation in offspring was assessed with the Infinium MethylationEPIC BeadChip Kit,  
122 following the manufacturer's specification (Illumina, San Diego, CA, USA) [38]. A total of 500 ng of  
123 genomic DNA from buccal swabs were bisulfite-treated using the ZymoResearch EZ DNA Methylation  
124 kit (Zymo Research Corp, Irvine, CA, USA). Datasets 1 and 3 were generated at the Avera McKennan  
125 Hospital (Sioux Falls, SD, USA), and dataset 2 at the Human Genotyping Facility (HugeF) of  
126 ErasmusMC (Rotterdam, the Netherlands; <http://www.glimdna.org/>).

127 As previously described [36, 39], quality control (QC) and normalization of the methylation  
128 data were performed with the pipelines developed by the Biobank-based Integrative Omics Study  
129 (BIOS) consortium [40]. The probe  $\beta$ -values represent the ratio of the methylated signal intensity to  
130 total signal intensity (methylated plus unmethylated) at a given CpG site and can range from 0  
131 (unmethylated) to 1 (fully methylated). Only samples that passed all five quality criteria of MethylAid  
132 were retained [41]. In addition, these samples were characterized by correct genetic relationships  
133 among the participants (omicsPrint) [42] and the absence of sex mismatches (DNAMArray and  
134 meffil) [43]. Functional normalization was performed with the dataset-specific optimum number of  
135 principal components. Methylation probes were coded as missing, if they had an intensity value of

136 zero, bead count < 3, or detection p-value > 0.01. A probe was excluded if it overlapped with a SNP  
137 or Insertion/Deletion (INDEL), mapped to multiple locations in the genome, or had a success rate <  
138 0.95 across all samples. Sample QC, probe filtering, normalization, and imputation of missing values  
139 were done within the three datasets separately. Of 865,859 sites on the array, 789,888 sites,  
140 787,711 sites, and 734,807 sites were retained after QC in datasets 1, 2, and 3, respectively, and we  
141 retained the 728,899 overlapping sites. Cellular proportions were predicted in epithelial tissues  
142 based on the cell-type deconvolution algorithm Hierarchical Epigenetic Dissection of Intra-Sample-  
143 Heterogeneity (HepiDISH) with the reduced partial correlation [44]. After QC, we removed all cross-  
144 reactive probes, probes in SNPs or on the X or Y chromosome and then imputed missing methylation  
145  $\beta$ -values (up to 5%; probes with higher missingness were excluded) with the imputePCA() function  
146 (missMDA R in the BIOS pipeline). Next, we removed methylation outliers (range: 291-505) that  
147 exceeded three times the interquartile range (ewaff R) [45] in each dataset. We then combined the  
148 imputed methylation  $\beta$ -values from all three datasets and obtained residual methylation levels by  
149 regressing the effects of sex, age, percentages of epithelial and natural killer cells, EPIC array row,  
150 and bisulfite sample plate. The top 10% most variable residualized methylation sites (72,889) were  
151 retained for further analysis (**Supplementary Figure 1, Supplementary Table 2**).

## 152 Genotyping and calculation of polygenic scores

153 Genotyping was done according to the manufacturer's protocols in 3,124 NTR samples on multiple  
154 genotyping platforms. Sample and SNP QC was performed per genotyping platform (build 37) for all  
155 NTR individuals. Genotype data were imputed to 1000 genomes phase 3 (v.5) [REF] and a combined  
156 HRC 1.1 (EGA version) [46, 47] and GONL (v.4) [48] reference panel. The first was used for calculation  
157 of genetic principal components (PCs) and the second for calculation of PGSs. More details on QC  
158 and imputation are included in **Supplementary Note 1** and on calculation of genetic PCs in  
159 **Supplementary Note 2**.

160 Parental and offspring PGSs for schizophrenia [49], smoking initiation [50], educational  
161 attainment [51], social deprivation [52], BMI [53], and height [53] were calculated based on GWASs,  
162 that all omitted NTR from the discovery (meta-)analysis. Before generating the PGSs, QC steps  
163 involved removing SNPs with Hardy-Weinberg equilibrium (HWE) p-values below 0.00001,  
164 Mendelian error rates above 1%, genotype call rate below 98%, effect allele frequencies below 0.01  
165 and above 0.99, imputation info below 0.10 and SNPs showing over 2% differences in allele  
166 frequencies between genotyping platforms. We retained 7,086,504 (schizophrenia), 6,982,922  
167 (smoking initiation), 7,118,026 (EA), 6,997,217 (social deprivation), 2,220,360 (BMI), and 2,206,961  
168 (height) SNPs.

169 LD weighted betas were calculated from the processed summary statistics in the LDpred  
170 package (v.0.9) to correct for the effects of LD, and to maximize predictive accuracy of the PGS [54].  
171 We randomly selected 2,500 individuals unrelated to the 2<sup>nd</sup> degree from the NTR as a reference  
172 population to obtain LD patterns. Weights to obtain the PGSs in PLINK2 (--score) [55] were  
173 calculated with an LD pruning window of 250 KB and the infinitesimal prior (LDpred-inf). We  
174 calculated the offspring, maternal, and paternal PGS for the 6 traits (18 PGSs total). Two dummy  
175 coded genotyping platforms and the first 10 genetic PCs were regressed on the PGSs, and the  
176 standardized residuals were analyzed. If maternal or paternal polygenic scores were missing, we  
177 assigned the parental PGS the value zero [2] ( $N_{dataset1} = 31$ ;  $N_{dataset2} = 213$ ;  $N_{dataset3} = 87$ ).

## 178 Analyses

179 As shown in Okbay et al. (2022) [9] (see also **Supplementary Note 3**), models that include the PGSs  
180 from offspring and two parents provide estimates of direct and indirect genetic effects, and allow for  
181 differences in maternal and paternal indirect genetic effects [9, 10].

182 The direct and indirect genetic effects were estimated by fitting the following regression  
183 model:



$$184 \quad Y_{ij} = \mu + \delta PGS_{ij} + \alpha_m PGS_{m(i)} + \alpha_p PGS_{p(i)} + \epsilon_{ij}, \quad (1)$$

185 where  $Y_{ij}$  is the residualized methylation probe  $\beta$ -value, and  $i$  and  $j$  index family and individual;  
 186  $\mu$  is the intercept,  $\delta$  is the direct effect of the offspring PGS;  $\alpha_m$  captures the maternal indirect  
 187 genetic effects;  $\alpha_p$  captures the paternal indirect genetic effects;  $PGS_{m(i)}$  and  $PGS_{p(i)}$  are the PGSs of  
 188 the mother and father in family  $i$ ; and  $\epsilon_{ij}$  is a residual term.

189 We extended equation 1 by including maternal, paternal, and offspring PGS for multiple traits.  
 190 This allows for the unbiased estimation of the direct and indirect genetic effects for a given complex  
 191 trait, while accounting for direct and indirect effects on all other traits in the model.

192 The direct and indirect genetic effects for multiple traits are modelled as follows:

$$193 \quad Y_{ij} = \mu + \delta PGS_{ij}^{trait\ 1} + \alpha_m PGS_{m(i)}^{trait\ 1} + \alpha_p PGS_{p(i)}^{trait\ 1} + \dots + \delta PGS_{ij}^{trait\ N} +$$

$$194 \quad \alpha_m PGS_{m(i)}^{trait\ N} + \alpha_p PGS_{p(i)}^{trait\ N} + \beta_1 Cov_{ij} + \beta_2 Cov_{ij} + \epsilon_{ij}, \quad (2)$$

195 where subscript trait 1 through trait  $N$  indicates the trait for which the polygenetic score was  
 196 calculated and  $Cov_{ij}$  and  $Cov_{ji}$  indicate the DNA methylation dataset.

197 We tested the association between the 72,889 CpGs and the offspring, maternal, and paternal  
 198 PGSs for the six traits, i.e., 18 predictors, using Generalized Estimation Equation (GEE) regression  
 199 modeling to correct the standard errors for family clustering of individuals [56]. All analyses were  
 200 carried out in R (version 4.2.2) [57]. We used the R package ‘gee’ (version 4.13-26) [58]. A Bonferroni  
 201 correction was applied for the number of independent DNA methylation probes tested ( $\alpha = 0.05/N$   
 202 independent variables), following the procedure of Nyholt (2004) [59], where the number of  
 203 independent tests is determined by Matrix Spectral Decomposition (MSD) of the imputed CpGs. The  
 204 correlated CpGs could be reduced to 1,850 independent linear combinations of the probes and we  
 205 set the significance level to  $(0.05/1,850) = 2.7 \times 10^{-5}$ . When analyzing the 72,889 CpGs, the

206 regression model for 192 CpGs did not converge. We present the results for the remaining 72,697  
207 successful analyses.

208 Significant CpGs from these analyses were followed up in 3 analyses. First, we queried the  
209 EWAS Atlas database to identify with which traits these CpGs had been previously associated [60].  
210 Second, we queried the GoDMC database (<http://mqtlldb.godmc.org.uk/>) for associated blood *cis*  
211 and *trans* methylation quantitative trait loci (mQTLs) for these CpGs [15] and examined if the  
212 identified mQTLs were mapped to genome-wide significant ( $p < 5 \times 10^{-8}$ ) SNPs for the respective  
213 traits. Third, we investigated whether the DNA methylation levels in buccal cells and prefrontal  
214 cortex were significantly correlated (Spearman rank correlations at False Discovery Rate (FDR)  $q <$   
215 0.05) in a published dataset of matched post-mortem samples ( $N = 120$ ) [61]. Last, we performed  
216 trait enrichment analyses of the top 100 most significant sites identified in the mega-analysis for  
217 each PGS and complex trait in the EWAS Atlas.

## 218 Results

219 Participant characteristics are described in **Table 1**. We analyzed data from 1,528 offspring and their  
220 parents (51.5% boys, mean [SD] age = 10 [2.8] years) to test the simultaneous association of  
221 offspring, maternal, and paternal PGSs for six complex traits with 72,697 buccal DNA methylation  
222 sites in offspring. The correlations between PGSs of different traits ranged from -0.29 and 0.23  
223 (mean = -0.004, median = -0.01), with the strongest correlation observed between the Maternal  
224 PGSs of smoking initiation and EA (**Figure 1**). We accounted for these correlations by fitting the PGSs  
225 of all traits simultaneously in one model. The correlations between the offspring and parental PGSs  
226 for the same trait were approximately 0.5 as expected (range = 0.43-0.53, mean = 0.48, median =  
227 0.47), while correlations between parental PGSs for the same trait were on average 0.04 (median =  
228 0.04, range = -0.02-0.10).

229 We observed independent significant associations between offspring methylation sites and  
230 maternal PGSs for schizophrenia (15), height (2), and BMI (1), and paternal PGSs for schizophrenia  
231 (1), EA (2), and height (4), (**Figure 2, Table 2**). The own offspring PGSs for schizophrenia, EA, and  
232 height showed associations with 21, 3, and 2 offspring methylation sites, respectively. None of the  
233 CpGs associated with maternal, paternal, or offspring PGSs overlapped. Thus, in total, 25 and 26  
234 significant CpG sites ( $p < 2.7 \times 10^{-5}$ , Bonferroni correction for 1,850 tests) were associated with  
235 indirect and direct genetic effects across the six complex traits, respectively (**Supplementary Figures**  
236 **2-7, Supplementary Table 3**).

237 The query of the EWAS Atlas database [60] for the 37 CpGs associated with direct or indirect  
238 genetic effects for schizophrenia showed that 12 CpGs (5 associated with the maternal and 7 with  
239 the offspring PGS) had known trait associations, though not with schizophrenia or other mental  
240 health traits (**Table 2**). Similarly, 3 out of the 5 CpGs associated with paternal (2) or offspring (3)  
241 PGSs for EA and 3 out of the 8 CpGs associated with maternal (2), paternal (4), or offspring (2) PGSs  
242 for height were included in the EWAS Atlas but showed no previous associations with the respective  
243 or a related complex trait. Trait enrichment analyses for the top 100 CpGs associated with offspring  
244 and parental PGSs for all six complex traits showed enrichment for 5 to 18 traits per PGS (mean =  
245 10.2, median = 10) with on average 2.2 CpGs associated per trait (range = 1-7, median = 2,  
246 **Supplementary Table 4**). Notably, many of the enriched traits are phenotypically associated with the  
247 relevant PGSs, such as enrichment for bipolar and major depressive disorder and maternal  
248 hypertensive disorders in pregnancy for CpGs associated with maternal indirect genetic effects for  
249 schizophrenia and household socioeconomic status in childhood for CpGs with direct and indirect  
250 genetic effects for schizophrenia.

251 A query of the GoDMC blood mQTL database [15] with the 51 significant CpGs identified 3,237  
252 *cis* mQTLs for 16 CpGs (mean = 202.3 mQTLs per associated CpG, median = 170.5) associated with  
253 schizophrenia (13 CpGs), EA (1), and height (2), with roughly half (1,639/3,237) of the mQTLs

254 associated with indirect genetic effect CpGs (**Table 2, Supplementary Table 5**). Of the 164 mQTLs  
255 associated with cg01633359 (paternal PGS for height) and 216 of the mQTLs associated with  
256 cg03480605 (offspring PGS for height) 56 and 17, respectively, had previously been associated with  
257 height at genome-wide significant levels ( $p < 5 \times 10^{-8}$ , **Table 2, Supplementary Figure 8,**  
258 **Supplementary Table 6**) [53]. None of the mQTLs for the schizophrenia and EA associated CpGs  
259 were previously found to be significantly associated with their respective traits at genome-wide  
260 significant levels [49, 51].

261 We looked at CpGs significantly associated with direct or indirect genetic effects in a published  
262 dataset ( $N = 120$ ) of correlations between DNA methylation levels in buccal cells and the prefrontal  
263 cortex [61]. One CpG associated with the maternal PGS for schizophrenia (cg09163778,  $r = 0.31$ ,  $p =$   
264  $5.86 \times 10^{-4}$ ), 2 CPGs associated with the offspring PGS for schizophrenia (cg02530860,  $r = 0.67$ ,  $p =$   
265  $7.51 \times 10^{-17}$ , cg01229327,  $r = 0.49$ ,  $p = 1.91 \times 10^{-8}$ ), and one CpG associated with the paternal PGS for  
266 height (cg01633359,  $r = 0.29$ ,  $p = 1.44 \times 10^{-3}$ ) showed significantly (FDR  $q < 0.05$ ) correlated DNA  
267 methylation levels between buccal cells and the prefrontal cortex (**Supplementary Table 7**).

## 268 Discussion

269 We investigated direct and indirect genetic influences on offspring DNA methylation for  
270 schizophrenia, smoking initiation, EA, social deprivation, BMI, and height in a cohort of 1,528  
271 children and their parents. We identified 37 CpGs significantly associated with schizophrenia, 5 with  
272 EA, 1 with BMI, and 8 with height. None of the identified CpGs overlapped between polygenic  
273 scores. We found the strongest genetic nurture effect for schizophrenia. Of the schizophrenia  
274 associated CpGs, 43% (16 CpGs, 93.7% maternal) showed an association with parental PGSs. Overall,  
275 the maternal genetic nurture effect for schizophrenia (15 CpGs) on offspring DNA methylation  
276 represented 83.3% of all maternal genetic nurture effects (18 CpGs) and 58% of all genetic nurture  
277 effects (25 CpGs).

278 We identified 25 CpGs associated with parental PGSs. These results strongly suggest that one  
279 mechanism for genetic nurture is via the offspring methylome. Of these, 18 CpGs were specific to  
280 associations with maternal PGSs, and 7 were specific to paternal PGSs, suggesting that genetically  
281 driven paternal behaviors have a smaller impact on offspring DNA methylation. The larger number of  
282 CpGs associated with maternal PGSs for schizophrenia (15/16 CpGs) is consistent with a stronger  
283 influence of genetic nurture effects on offspring DNA methylation in utero. This aligns with the  
284 "Developmental Origins of Health and Disease" (DOHaD) hypothesis, that prenatal environmental  
285 factors have long-term effects through epigenetic mechanisms [62]. Unfavorable intrauterine  
286 conditions leading to poor fetal growth are particularly relevant to the DOHaD hypothesis [63, 64].  
287 Observational studies indicate that the intrauterine environment is influenced by maternal height  
288 and weight, and both direct and maternal indirect genetic effects affect offspring birth length,  
289 weight, and gestational age [65, 66]. The CpGs associated with maternal PGSs for height (2 CpGs)  
290 and BMI (1 CpG) may be involved in these processes. However, recent research suggests that the  
291 impact of intrauterine growth restriction on complex disease risk is limited, and that non-  
292 transmitted maternal genetic factors for birth weight do not contribute to offspring disease risk  
293 beyond genetic pleiotropy with offspring genetic factors [67]. This aligns with our finding that the  
294 largest number of findings for non-transmitted maternal genetic factors is not for body size but for  
295 schizophrenia.

296 We explored the literature whether the significant CpGs for each trait had been associated  
297 with the PGS for that trait and found that none of the CpGs significantly associated with direct or  
298 indirect genetic effects had been associated with polygenic scores for schizophrenia or BMI [23, 29-  
299 31]. These previous studies all comprised adults, whereas our study focused on children. The  
300 previous studies on schizophrenia mainly comprised adult patient populations focused on DNA  
301 methylation in blood or post-mortem brain samples ( $N$  range = 88-847). DNA methylation is often  
302 tissue specific and despite identifying blood *cis* mQTLs for approximately one-third of the CpGs  
303 associated with direct and indirect genetic effects, some *cis* mQTLs are not found in blood. However,

304 given the high (71%) concordance between blood and buccal *cis* mQTLs, we expect to have identified  
305 most *cis* mQTLs [68]. None of the identified CpGs were associated with *trans* mQTLs. Three CpGs  
306 associated with schizophrenia PGSs (1 maternal, 2 offspring) and one CpG associated with paternal  
307 PGS for height showed correlated methylation levels between buccal cells and prefrontal cortex  
308 brain samples [61].

309 This study is the first to investigate how indirect genetic effects influence DNA methylation in  
310 offspring. It also explored the direct genetic effects on DNA methylation in children. We analyzed  
311 data from 1,528 children and their parents. Most children were related to at least one other person  
312 in the sample, such as their co-twin and thus the effective sample size is smaller than 1,528. Given  
313 the relatively small sample size, we took three measures to reduce the multiple testing burden. First,  
314 we focused on the top 10% most variable CpGs, which have been shown to be the most reliable [32].  
315 Second, we adjusted our multiple testing threshold based on the number of independent CpGs,  
316 considering the high correlations between them. Third, our approach of modeling multiple complex  
317 traits simultaneously allowed us to avoid correcting for the number of traits investigated, which  
318 would have been necessary in a separate modeling strategy. Despite these considerations, our  
319 application highlights its potential to investigate epigenetic mechanisms of indirect genetic effects  
320 and encourages testing in large family cohorts, across different tissues, and populations.

321 In summary, we found support for the hypothesis that indirect genetic effects are associated  
322 with DNA methylation in offspring. By simultaneously modelling multiple complex traits, we found  
323 robust associations of indirect genetic effects on offspring DNA methylation for schizophrenia, EA,  
324 BMI, and height, but not smoking initiation and social deprivation. Most of these associations were  
325 discovered in relation to maternal PGSs, consistent with the interpretation that the prenatal  
326 environment influences the DNA methylation of offspring during embryonic development.

## 327 Declarations

## 328 Acknowledgments

329 The Netherlands Twin Register (NTR) warmly thanks all twin families for their participation and are  
330 grateful to all researchers involved in the data collection for the ACTION Biomarker Study. The  
331 current work is supported by the Consortium on Individual Development (CID) and the “Aggression  
332 in Children: Unraveling gene-environment interplay to inform Treatment and InterventiON  
333 strategies” project (ACTION). CID is funded through the Gravitation Program of the Dutch Ministry of  
334 Education, Culture, and Science and the Netherlands Organization for Scientific Research (NWO  
335 grant number 024-001-003). ACTION received funding from the European Union Seventh Framework  
336 Program (FP7/2007-2013) under grant agreement no 602768. M.B. is supported by an ERC  
337 consolidator grant (WELL-BEING 771057, PI Bartels) and NWO VICI grant (VI.C.2111.054, PI Bartels).  
338 J.D. acknowledges the NWO-funded X-omics project (184.034.019) and D.I.B. the Royal Netherlands  
339 Academy of Arts and Sciences Professor Award (PAH/6635).

## 340 Conflict of Interest

341 The authors declare that the research was conducted in the absence of any commercial or financial  
342 relationships that could be construed as a potential conflict of interest.

## 343 Authors' contributions

344 Conceptualization, F.A.H., R.P., J.J.H., C.V.D., J.D. and D.I.B.; methodology, C.V.D; formal analysis,  
345 F.A.H. and R.P.; investigation, F.A.H., M.B. and D.I.B.; resources, R.P., A.J.V.A., E.A.E., J.J.H. and J.D.;  
346 writing—original draft preparation, F.A.H., R.P., J.J.H., C.V.D., J.D. and D.I.B.; writing—review and  
347 editing, F.A.H., R.P., A.J.V.A., M.B., J.J.H., C.V.D., J.D. and D.I.B.; visualization, F.A.H. and C.V.D.;  
348 supervision, J.D. and D.I.B.; funding acquisition, M.B. and D.I.B. All authors have read and agreed to  
349 the published version of the manuscript.

350 Availability of data and code

351 The standardized protocol for large scale collection of buccal-cell (and urine) samples in the home  
352 situation as developed for the ACTION Biomarker Study in children is available at

353 <https://dx.doi.org/10.17504/protocols.io.eq2ly7qkwlx9/v1>. The data of the Netherlands Twin

354 Register (NTR) may be accessed, upon approval of the data access committee, through the NTR

355 (<https://ntr-data-request.psy.vu.nl/>). The pipeline for DNA methylation–array analysis developed by

356 the Biobank-based Integrative Omics Study (BIOS) consortium is available at

357 [https://molepi.github.io/DNAArray\\_workflow/](https://molepi.github.io/DNAArray_workflow/) (<https://doi.org/10.5281/zenodo.3355292>). All

358 software used to perform the analyses are available online. All scripts used to run the analyses

359 (empirical and simulated) are available at our GitHub

360 (<https://github.com/FionaAHagenbeek/MethylationPGS>).



## 361 References

- 362 1. Bates TC, Maher BS, Medland SE, McAloney K, Wright MJ, Hansell NK, et al. The Nature of  
363 Nurture: Using a Virtual-Parent Design to Test Parenting Effects on Children’s Educational  
364 Attainment in Genotyped Families. *Twin Research and Human Genetics*. 2018;21:73–83.
- 365 2. Kong A, Thorleifsson G, Frigge ML, Vilhjalmsdottir BJ, Young AI, Thorgeirsson TE, et al. The nature  
366 of nurture: Effects of parental genotypes. *Science*. 2018;359:424–428.
- 367 3. Balbona JV, Kim Y, Keller MC. Estimation of Parental Effects Using Polygenic Scores. *Behav*  
368 *Genet*. 2021;51:264–278.
- 369 4. Cavalli-Sforza LL, Feldman MW. Cultural transmission and evolution: a quantitative approach.  
370 *Monogr Popul Biol*. 1981;16:1–388.
- 371 5. Eaves L. A model for sibling effects in man. *Heredity*. 1976;36:205–214.
- 372 6. Odling-Smee J, Laland KN. Ecological Inheritance and Cultural Inheritance: What Are They and  
373 How Do They Differ? *Biol Theory*. 2011;6:220–230.
- 374 7. McAdams TA, Cheesman R, Ahmadzadeh YI. Annual Research Review: Towards a deeper  
375 understanding of nature and nurture: combining family-based quasi-experimental methods  
376 with genomic data. *Journal of Child Psychology and Psychiatry*. 2023;64:693–707.
- 377 8. Swagerman SC, van Bergen E, Dolan C, de Geus EJC, Koenis MMG, Hulshoff Pol HE, et al.  
378 Genetic transmission of reading ability. *Brain and Language*. 2017;172:3–8.
- 379 9. Okbay A, Wu Y, Wang N, Jayashankar H, Bennett M, Nehzati SM, et al. Polygenic prediction of  
380 educational attainment within and between families from genome-wide association analyses in  
381 3 million individuals. *Nat Genet*. 2022;54:437–449.
- 382 10. Tubbs JD, Porsch RM, Cherny SS, Sham PC. The Genes We Inherit and Those We Don’t:  
383 Maternal Genetic Nurture and Child BMI Trajectories. *Behav Genet*. 2020;50:310–319.
- 384 11. Bruins S, Dolan CV, Boomsma DI. The Power to Detect Cultural Transmission in the Nuclear  
385 Twin Family Design With and Without Polygenic Risk Scores and in the Transmitted–  
386 Nontransmitted (Alleles) Design. *Twin Res Hum Genet*. 2020;23:265–270.

- 387 12. Wang B, Baldwin JR, Schoeler T, Cheesman R, Barkhuizen W, Dudbridge F, et al. Robust genetic  
388 nurture effects on education: A systematic review and meta-analysis based on 38,654 families  
389 across 8 cohorts. *The American Journal of Human Genetics*. 2021;108:1780–1791.
- 390 13. Buescher JM, Driggers EM. Integration of omics: more than the sum of its parts. *Cancer &*  
391 *Metabolism*. 2016;4:4.
- 392 14. Carlberg C, Molnár F. What Is Epigenomics? In: Carlberg C, Molnár F, editors. *Human*  
393 *Epigenomics*, Singapore: Springer; 2018. p. 3–18.
- 394 15. Min JL, Hemani G, Hannon E, Dekkers KF, Castillo-Fernandez J, Luijk R, et al. Genomic and  
395 phenotypic insights from an atlas of genetic effects on DNA methylation. *Nat Genet*.  
396 2021;53:1311–1321.
- 397 16. van Dongen J, Nivard MG, Willemsen G, Hottenga J-J, Helmer Q, Dolan CV, et al. Genetic and  
398 environmental influences interact with age and sex in shaping the human methylome. *Nat*  
399 *Commun*. 2016;7:11115.
- 400 17. Zhou FC, Resendiz M, Lo C-L. Chapter 31 - Environmental Influence of Epigenetics. In: Tollefsbol  
401 TO, editor. *Handbook of Epigenetics (Second Edition)*, Academic Press; 2017. p. 477–494.
- 402 18. Weaver ICG, Cervoni N, Champagne FA, D’Alessio AC, Sharma S, Seckl JR, et al. Epigenetic  
403 programming by maternal behavior. *Nat Neurosci*. 2004;7:847–854.
- 404 19. Cecil CAM, Zhang Y, Nolte T. Childhood maltreatment and DNA methylation: A systematic  
405 review. *Neuroscience & Biobehavioral Reviews*. 2020;112:392–409.
- 406 20. Parade SH, Huffhines L, Daniels TE, Stroud LR, Nugent NR, Tyrka AR. A systematic review of  
407 childhood maltreatment and DNA methylation: candidate gene and epigenome-wide  
408 approaches. *Transl Psychiatry*. 2021;11:1–33.
- 409 21. Rubens M, Bruenig D, Adams JAM, Suresh SM, Sathyanarayanan A, Haslam D, et al. Childhood  
410 maltreatment and DNA methylation: A systematic review. *Neuroscience & Biobehavioral*  
411 *Reviews*. 2023;147:105079.

- 412 22. Szyf M, McGowan P, Meaney MJ. The social environment and the epigenome. *Environmental*  
413 *and Molecular Mutagenesis*. 2008;49:46–60.
- 414 23. Hannon E, Dempster E, Viana J, Burrage J, Smith AR, Macdonald R, et al. An integrated genetic-  
415 epigenetic analysis of schizophrenia: evidence for co-localization of genetic associations and  
416 differential DNA methylation. *Genome Biology*. 2016;17:176.
- 417 24. Montano C, Taub MA, Jaffe A, Briem E, Feinberg JI, Trygvadottir R, et al. Association of DNA  
418 Methylation Differences With Schizophrenia in an Epigenome-Wide Association Study. *JAMA*  
419 *Psychiatry*. 2016;73:506–514.
- 420 25. Christiansen C, Castillo-Fernandez JE, Domingo-Relloso A, Zhao W, El-Sayed Moustafa JS, Tsai  
421 P-C, et al. Novel DNA methylation signatures of tobacco smoking with trans-ethnic effects.  
422 *Clinical Epigenetics*. 2021;13:36.
- 423 26. van Dongen J, Willemsen G, BIOS Consortium, de Geus EJ, Boomsma DI, Neale MC. Effects of  
424 smoking on genome-wide DNA methylation profiles: A study of discordant and concordant  
425 monozygotic twin pairs. *eLife*. 2023;12:e83286.
- 426 27. Dick KJ, Nelson CP, Tsaprouni L, Sandling JK, Aïssi D, Wahl S, et al. DNA methylation and body-  
427 mass index: a genome-wide analysis. *The Lancet*. 2014;383:1990–1998.
- 428 28. Vehmeijer FOL, Küpers LK, Sharp GC, Salas LA, Lent S, Jima DD, et al. DNA methylation and  
429 body mass index from birth to adolescence: meta-analyses of epigenome-wide association  
430 studies. *Genome Medicine*. 2020;12:105.
- 431 29. Kiltchewskij DJ, Reay WR, Geaghan MP, Atkins JR, Xavier A, Zhang X, et al. Alteration of DNA  
432 Methylation and Epigenetic Scores Associated With Features of Schizophrenia and Common  
433 Variant Genetic Risk. *Biological Psychiatry*. 2023. 2023.  
434 <https://doi.org/10.1016/j.biopsych.2023.07.010>.
- 435 30. Viana J, Hannon E, Dempster E, Pidsley R, Macdonald R, Knox O, et al. Schizophrenia-associated  
436 methylomic variation: molecular signatures of disease and polygenic risk burden across  
437 multiple brain regions. *Human Molecular Genetics*. 2017;26:210–225.

- 438 31. Yu C, Hodge AM, Wong EM, Joo JE, Makalic E, Schmidt DF, et al. Does genetic predisposition  
439 modify the effect of lifestyle-related factors on DNA methylation? *Epigenetics*. 2022;17:1838–  
440 1847.
- 441 32. Van Asselt AJ, Beck JJ, Finnicum CT, Johnson BN, Kallsen N, Hottenga JJ, et al. Genome-Wide  
442 DNA Methylation Profiles in Whole-Blood and Buccal Samples—Cross-Sectional, Longitudinal,  
443 and across Platforms. *International Journal of Molecular Sciences*. 2023;24:14640.
- 444 33. Ligthart L, Beijsterveldt CEM van, Kevenaer ST, Zeeuw E de, Bergen E van, Bruins S, et al. The  
445 Netherlands Twin Register: Longitudinal Research Based on Twin and Twin-Family Designs.  
446 *Twin Research and Human Genetics*. 2019;22:623–636.
- 447 34. Bartels M, Hendriks A, Mauri M, Krapohl E, Whipp A, Bolhuis K, et al. Childhood aggression and  
448 the co-occurrence of behavioural and emotional problems: results across ages 3–16 years from  
449 multiple raters in six cohorts in the EU-ACTION project. *Eur Child Adolesc Psychiatry*.  
450 2018;27:1105–1121.
- 451 35. Hagenbeek FA, Roetman PJ, Pool R, Kluft C, Harms AC, van Dongen J, et al. Urinary Amine and  
452 Organic Acid Metabolites Evaluated as Markers for Childhood Aggression: The ACTION  
453 Biomarker Study. *Frontiers in Psychiatry*. 2020;11.
- 454 36. van Dongen J, Ehli EA, Jansen R, van Beijsterveldt CEM, Willemsen G, Hottenga JJ, et al.  
455 Genome-wide analysis of DNA methylation in buccal cells: a study of monozygotic twins and  
456 mQTLs. *Epigenetics & Chromatin*. 2018;11:54.
- 457 37. Hagenbeek FA, Dongen J van, Roetman PJ, Ehli EA, Bartels M, Vermeiren RRJM, et al. ACTION  
458 Biomarker Study. *Protocols*. 2023. March 2023.  
459 <https://dx.doi.org/10.17504/protocols.io.eq2ly7qkwlx9/v1>.
- 460 38. Moran S, Arribas C, Esteller M. Validation of a DNA methylation microarray for 850,000 CpG  
461 sites of the human genome enriched in enhancer sequences. *Epigenomics*. 2016;8:389–399.

- 462 39. van Dongen J, Hagenbeek FA, Suderman M, Roetman PJ, Sugden K, Chiocchetti AG, et al. DNA  
463 methylation signatures of aggression and closely related constructs: A meta-analysis of  
464 epigenome-wide studies across the lifespan. *Mol Psychiatry*. 2021;26:2148–2162.
- 465 40. Sinke L, van Iterson M, Cats D, Slieker R, Heijmans B. DNAmArray: Streamlined workflow for  
466 the quality control, normalization, and analysis of Illumina methylation array data. 2019.
- 467 41. van Iterson M, Tobi EW, Slieker RC, den Hollander W, Luijk R, Slagboom PE, et al. MethylAid:  
468 visual and interactive quality control of large Illumina 450k datasets. *Bioinformatics*.  
469 2014;30:3435–3437.
- 470 42. van Iterson M, Cats D, Hop P, BIOS Consortium, Heijmans BT. omicsPrint: detection of data  
471 linkage errors in multiple omics studies. *Bioinformatics*. 2018;34:2142–2143.
- 472 43. Min JL, Hemani G, Davey Smith G, Relton C, Suderman M. Meffil: efficient normalization and  
473 analysis of very large DNA methylation datasets. *Bioinformatics*. 2018;34:3983–3989.
- 474 44. Zheng SC, Webster AP, Dong D, Feber A, Graham DG, Sullivan R, et al. A novel cell-type  
475 deconvolution algorithm reveals substantial contamination by immune cells in saliva, buccal  
476 and cervix. *Epigenomics*. 2018;10:925–940.
- 477 45. Suderman, Matthew, Sharp, Gemma, Yousefi, Paul, Kupers, Leanne. perishky/ewaff: Efficient  
478 and Flexible EWAS version 0.0.2 from GitHub. 2019.
- 479 46. McCarthy S, Das S, Kretzschmar W, Delaneau O, Wood AR, Teumer A, et al. A reference panel  
480 of 64,976 haplotypes for genotype imputation. *Nat Genet*. 2016;48:1279–1283.
- 481 47. The Haplotype Reference Consortium - EGA European Genome-Phenome Archive. [https://ega-](https://ega-archive.org/studies/EGAS00001001710)  
482 [archive.org/studies/EGAS00001001710](https://ega-archive.org/studies/EGAS00001001710). Accessed 6 April 2023.
- 483 48. Boomsma DI, Wijmenga C, Slagboom EP, Swertz MA, Karssen LC, Abdellaoui A, et al. The  
484 Genome of the Netherlands: design, and project goals. *Eur J Hum Genet*. 2014;22:221–227.
- 485 49. Trubetskoy V, Pardiñas AF, Qi T, Panagiotaropoulou G, Awasthi S, Bigdeli TB, et al. Mapping  
486 genomic loci implicates genes and synaptic biology in schizophrenia. *Nature*. 2022;604:502–  
487 508.

- 488 50. Liu M, Jiang Y, Wedow R, Li Y, Brazel DM, Chen F, et al. Association studies of up to 1.2 million  
489 individuals yield new insights into the genetic etiology of tobacco and alcohol use. *Nat Genet.*  
490 2019;51:237–244.
- 491 51. Lee JJ, Wedow R, Okbay A, Kong E, Maghzian O, Zacher M, et al. Gene discovery and polygenic  
492 prediction from a genome-wide association study of educational attainment in 1.1 million  
493 individuals. *Nat Genet.* 2018;50:1112–1121.
- 494 52. Hill WD, Hagenaars SP, Marioni RE, Harris SE, Liewald DCM, Davies G, et al. Molecular Genetic  
495 Contributions to Social Deprivation and Household Income in UK Biobank. *Current Biology.*  
496 2016;26:3083–3089.
- 497 53. Yengo L, Sidorenko J, Kemper KE, Zheng Z, Wood AR, Weedon MN, et al. Meta-analysis of  
498 genome-wide association studies for height and body mass index in ~700000 individuals of  
499 European ancestry. *Hum Mol Genet.* 2018;27:3641–3649.
- 500 54. Vilhjálmsson BJ, Yang J, Finucane HK, Gusev A, Lindström S, Ripke S, et al. Modeling Linkage  
501 Disequilibrium Increases Accuracy of Polygenic Risk Scores. *The American Journal of Human*  
502 *Genetics.* 2015;97:576–592.
- 503 55. Chang CC, Chow CC, Tellier LC, Vattikuti S, Purcell SM, Lee JJ. Second-generation PLINK: rising  
504 to the challenge of larger and richer datasets. *GigaScience.* 2015;4:s13742-015-0047–0048.
- 505 56. Rogers P, Stoner J. Modification of the Sandwich Estimator in Generalized Estimating Equations  
506 with Correlated Binary Outcomes in Rare Event and Small Sample Settings. *American Journal of*  
507 *Applied Mathematics and Statistics.* 2018;3:243–251.
- 508 57. R Core Team. *R: A Language and Environment for Statistical Computing.* Vienna, Austria: R  
509 Foundation for Statistical Computing; 2022.
- 510 58. Carey VJ. *gee: Generalized Estimation Equation Solver.* 2022.
- 511 59. Nyholt DR. A Simple Correction for Multiple Testing for Single-Nucleotide Polymorphisms in  
512 Linkage Disequilibrium with Each Other. *Am J Hum Genet.* 2004;74:765–769.

- 513 60. Xiong Z, Yang F, Li M, Ma Y, Zhao W, Wang G, et al. EWAS Open Platform: integrated data,  
514 knowledge and toolkit for epigenome-wide association study. *Nucleic Acids Research*.  
515 2022;50:D1004–D1009.
- 516 61. Sommerer Y, Ohlei O, Dobricic V, Oakley DH, Wesse T, Sedghpour Sabet S, et al. A correlation  
517 map of genome-wide DNA methylation patterns between paired human brain and buccal  
518 samples. *Clinical Epigenetics*. 2022;14:139.
- 519 62. Langley-Evans SC, McMullen S. Developmental Origins of Adult Disease. *Medical Principles and*  
520 *Practice*. 2010;19:87–98.
- 521 63. Barker DJP. Fetal origins of coronary heart disease. *BMJ*. 1995;311:171–174.
- 522 64. Barker DJP. Fetal origins of cardiovascular disease. *Annals of Medicine*. 1999;31:3–6.
- 523 65. Eaves LJ, Pourcain BSt, Smith GD, York TP, Evans DM. Resolving the Effects of Maternal and  
524 Offspring Genotype on Dyadic Outcomes in Genome Wide Complex Trait Analysis (“M-GCTA”).  
525 *Behav Genet*. 2014;44:445–455.
- 526 66. Zhang G, Bacelis J, Lengyel C, Teramo K, Hallman M, Helgeland Ø, et al. Assessing the Causal  
527 Relationship of Maternal Height on Birth Size and Gestational Age at Birth: A Mendelian  
528 Randomization Analysis. *PLoS Med*. 2015;12:e1001865.
- 529 67. Leinonen JT, Pirinen M, Tukiainen T. Disentangling the link between maternal influences on  
530 birth weight and disease risk in 36,211 genotyped mother–child pairs. *Commun Biol*.  
531 2024;7:175.
- 532 68. Ohlei O, Sommerer Y, Dobricic V, Homann J, Deecke L, Schilling M, et al. Genome-wide QTL  
533 mapping across three tissues highlights several Alzheimer’s and Parkinson’s disease loci  
534 potentially acting via DNA methylation. 2023:2023.12.22.23300365.
- 535
- 536

537 **Figure legends**

538 **Figure 1.** Pearson correlations among the offspring, maternal, and paternal polygenic scores for  
539 schizophrenia, smoking initiation, educational attainment, social deprivation, body mass index (BMI),  
540 and height.

541 **Figure 2.** Buccal CpGs significantly associated ( $\alpha = 2.7 \times 10^{-5}$ ) with maternal (○), paternal (□), or  
542 offspring (Δ) polygenic scores for schizophrenia, educational attainment, body mass index (BMI), and  
543 height.



544 **Tables**

545 **Table 1.** Demographics of the individuals included across the three buccal DNA methylation datasets in this study.

|                                            | <b>MZ</b>          | <b>DZ</b>            | <b>Triplets</b>    | <b>Siblings</b>     | <b>Total<sup>a</sup></b> |
|--------------------------------------------|--------------------|----------------------|--------------------|---------------------|--------------------------|
| <i>N</i> (complete twin pairs<br>or trios) | 1,170 (538)        | 209 (99)             | 34 (9)             | 115                 | 1,528                    |
| Mean ( <i>SD</i> ) [range] age             | 9.8 (2.7) [1 – 18] | 9.9 (1.7) [5.7 – 13] | 7.7 (5.6) [2 - 17] | 11.9 (2.6) [5 - 17] | 10 (2.8) [1 - 18]        |
| <i>N</i> (%) males                         | 614 (52.5%)        | 101 (48.3%)          | 18 (52.9%)         | 54 (47%)            | 787 (51.5%)              |

546 <sup>a</sup> Parental polygenic scores for one or both parents were missing for 331 children, we assigned these parental PGS the value zero.

547 Note, MZ = monozygotic twins, DZ = dizygotic twins.

548

549 **Table 2.** Buccal CpGs significantly associated ( $\alpha = 2.7 \times 10^{-5}$ ) with maternal, paternal, or offspring polygenic scores for schizophrenia, educational  
550 attainment (EA), body mass index (BMI), and height.

| PGS                     | CpG        | CHR:BP <sup>a</sup> | Gene                 | mQTLs | SNPs | Complex traits                                                                            |
|-------------------------|------------|---------------------|----------------------|-------|------|-------------------------------------------------------------------------------------------|
| Maternal Schizophrenia  | cg00974944 | 3:61649924          | <i>PTPRG</i>         |       |      |                                                                                           |
| Maternal Schizophrenia  | cg02039858 | 14:65828769         |                      |       |      |                                                                                           |
| Maternal Schizophrenia  | cg03174043 | 2:20548412          |                      | 185   |      | fractional exhaled nitric oxide                                                           |
| Maternal Schizophrenia  | cg03526788 | 8:130899478         | <i>FAM49B</i>        |       |      |                                                                                           |
| Maternal Schizophrenia  | cg04822154 | 8:124692680         |                      |       |      |                                                                                           |
| Maternal Schizophrenia  | cg07980854 | 20:57586338         |                      | 634   |      | breast cancer; type 2 diabetes; atopy; psoriasis                                          |
| Maternal Schizophrenia  | cg09163778 | 6:31125417          | <i>TCF19; CCHCR1</i> |       |      |                                                                                           |
| Maternal Schizophrenia  | cg10365572 | 5:141245930         | <i>PCDH1</i>         |       |      |                                                                                           |
| Maternal Schizophrenia  | cg12098069 | 13:42537172         | <i>VWA8-AS1</i>      |       |      |                                                                                           |
| Maternal Schizophrenia  | cg12501870 | 8:81803721          |                      | 182   |      |                                                                                           |
| Maternal Schizophrenia  | cg12759387 | 1:27849177          |                      | 177   |      | systemic lupus erythematosus; polychlorinated biphenyls exposure                          |
| Maternal Schizophrenia  | cg21028402 | 6:113932902         |                      | 297   |      | helicobacter pylori infection; oral squamous cell carcinoma                               |
| Maternal Schizophrenia  | cg22280238 | 17:79251323         | <i>SLC38A10</i>      |       |      |                                                                                           |
| Maternal Schizophrenia  | cg26017484 | 1:3322309           | <i>PRDM16</i>        |       |      | adenoma                                                                                   |
| Maternal Schizophrenia  | cg27277458 | 10:63597194         |                      |       |      |                                                                                           |
| Paternal Schizophrenia  | cg02838980 | 16:10402487         |                      |       |      |                                                                                           |
| Offspring Schizophrenia | cg01229327 | 19:54311998         | <i>NLRP12</i>        |       |      |                                                                                           |
| Offspring Schizophrenia | cg02530860 | 8:144371537         |                      | 646   |      | gender; sperm viability; assisted reproduction technology; infant sex; sexually dimorphic |
| Offspring Schizophrenia | cg03161422 | 4:175256045         |                      |       |      |                                                                                           |
| Offspring Schizophrenia | cg03836484 | 10:25349182         | <i>ENKUR</i>         |       |      |                                                                                           |
| Offspring Schizophrenia | cg09950681 | 11:393392           | <i>PKP3</i>          |       |      |                                                                                           |
| Offspring Schizophrenia | cg09967523 | 18:18943072         | <i>GREB1L</i>        |       |      |                                                                                           |
| Offspring Schizophrenia | cg12381295 | 20:3880297          | <i>PANK2</i>         |       |      | gingivo-buccal oral squamous cell carcinoma (OSCC-GB)                                     |

| PGS                     | CpG        | CHR:BP <sup>a</sup> | Gene                                   | mQTLs | SNPs | Complex traits                                                                                                                                                                                        |
|-------------------------|------------|---------------------|----------------------------------------|-------|------|-------------------------------------------------------------------------------------------------------------------------------------------------------------------------------------------------------|
| Offspring Schizophrenia | cg12614148 | 1:118325026         |                                        | 98    |      |                                                                                                                                                                                                       |
| Offspring Schizophrenia | cg12823387 | 1:214614656         | <i>PTPN14</i>                          |       |      |                                                                                                                                                                                                       |
| Offspring Schizophrenia | cg15518113 | 1:167400121         | <i>CD247</i>                           | 105   |      | Air pollution (NO <sub>2</sub> ); adrenocortical carcinoma; smoking; multiple sclerosis;                                                                                                              |
| Offspring Schizophrenia | cg15571646 | 2:238767351         | <i>RAMP1</i>                           |       |      |                                                                                                                                                                                                       |
| Offspring Schizophrenia | cg16739178 | 16:85470674         |                                        | 50    |      | papillary thyroid carcinoma; aging; BMI; Crohn's disease; Behcet's disease; maternal hypertensive disorders in pregnancy; gestational age; blood C-reactive protein level; inflammatory bowel disease |
| Offspring Schizophrenia | cg17727125 | 8:38441156          |                                        |       |      |                                                                                                                                                                                                       |
| Offspring Schizophrenia | cg20516845 | 21:43823604         | <i>UBASH3A</i>                         | 140   |      |                                                                                                                                                                                                       |
| Offspring Schizophrenia | cg20742175 | 20:57267357         | <i>NPEPL1</i> ;<br><i>STX16-NPEPL1</i> |       |      | high risk cutaneous squamous cell carcinoma (cSCC)                                                                                                                                                    |
| Offspring Schizophrenia | cg20807751 | 9:84025287          |                                        |       |      |                                                                                                                                                                                                       |
| Offspring Schizophrenia | cg22889887 | 11:113433931        |                                        | 6     |      |                                                                                                                                                                                                       |
| Offspring Schizophrenia | cg23464619 | 13:95513506         |                                        | 50    |      | hepatocellular carcinoma; colorectal laterally spreading tumor; inflammatory bowel disease; ulcerative colitis                                                                                        |
| Offspring Schizophrenia | cg24812103 | 8:101735630         | <i>PABPC1</i>                          | 244   |      | prenatal arsenic exposure; gestational diabetes mellitus; inflammatory bowel disease                                                                                                                  |
| Offspring Schizophrenia | cg25607267 | 12:122362708        | <i>WDR66</i>                           |       |      |                                                                                                                                                                                                       |
| Offspring Schizophrenia | cg27475979 | 16:89471039         | <i>ANKRD11</i>                         |       |      |                                                                                                                                                                                                       |
| Paternal EA             | cg14576502 | 8:102962279         | <i>NCALD</i>                           |       |      | recurrent adult-type IDH-mutant gliomas                                                                                                                                                               |
| Paternal EA             | cg15336177 | 1:99369228          | <i>LPPR5</i>                           |       |      |                                                                                                                                                                                                       |
| Offspring EA            | cg04975399 | 1:67822225          | <i>IL12RB2</i>                         |       |      | fractional exhaled nitric oxide                                                                                                                                                                       |
| Offspring EA            | cg05083647 | 1:204897364         | <i>NFASC</i>                           |       |      |                                                                                                                                                                                                       |
| Offspring EA            | cg06629713 | 2:60580559          |                                        | 43    |      | primary Sjogren's Syndrome; obesity; Type 2 diabetes; asthma; atopy; Crohn's disease; fractional exhaled nitric oxide; hepatitis B virus-related liver disease progression                            |
| Maternal BMI            | cg06565683 | 20:46817989         |                                        |       |      |                                                                                                                                                                                                       |
| Maternal Height         | cg21894669 | 2:165379442         | <i>GRB14</i>                           |       |      |                                                                                                                                                                                                       |
| Maternal Height         | cg22338356 | 8:48739161          | <i>PRKDC</i>                           |       |      | Down Syndrome; Fetal alcohol spectrum disorder                                                                                                                                                        |

| PGS              | CpG        | CHR:BP <sup>a</sup> | Gene   | mQTLs | SNPs | Complex traits                                          |
|------------------|------------|---------------------|--------|-------|------|---------------------------------------------------------|
| Paternal Height  | cg01633359 | 5:33439359          |        | 164   | 56   |                                                         |
| Paternal Height  | cg03338154 | 6:41121714          | TREML1 |       |      |                                                         |
| Paternal Height  | cg12738049 | 15:76509692         | ETFA   |       |      |                                                         |
| Paternal Height  | cg23975250 | 22:44757380         |        |       |      | sexually dimorphic                                      |
| Offspring Height | cg02319662 | 4:108127694         |        |       |      |                                                         |
| Offspring Height | cg03480605 | 7:151038446         | NUB1   | 216   | 17   | maternal smoking; obesity; oral squamous cell carcinoma |

551 <sup>a</sup>CHR:BP = Chromosome base pair location in genome build 37. mQTLs = number of blood *cis* methylation quantitative trait loci (mQTLs) [15] associated with  
552 the CpGs. SNPs = number of genome-wide significant ( $p < 5 \times 10^{-8}$ ) SNPs overlapping with blood *cis* mQTLs for the CpGs. Complex traits = complex traits  
553 previously associated with the CpGs in the EWAS Atlas [60].



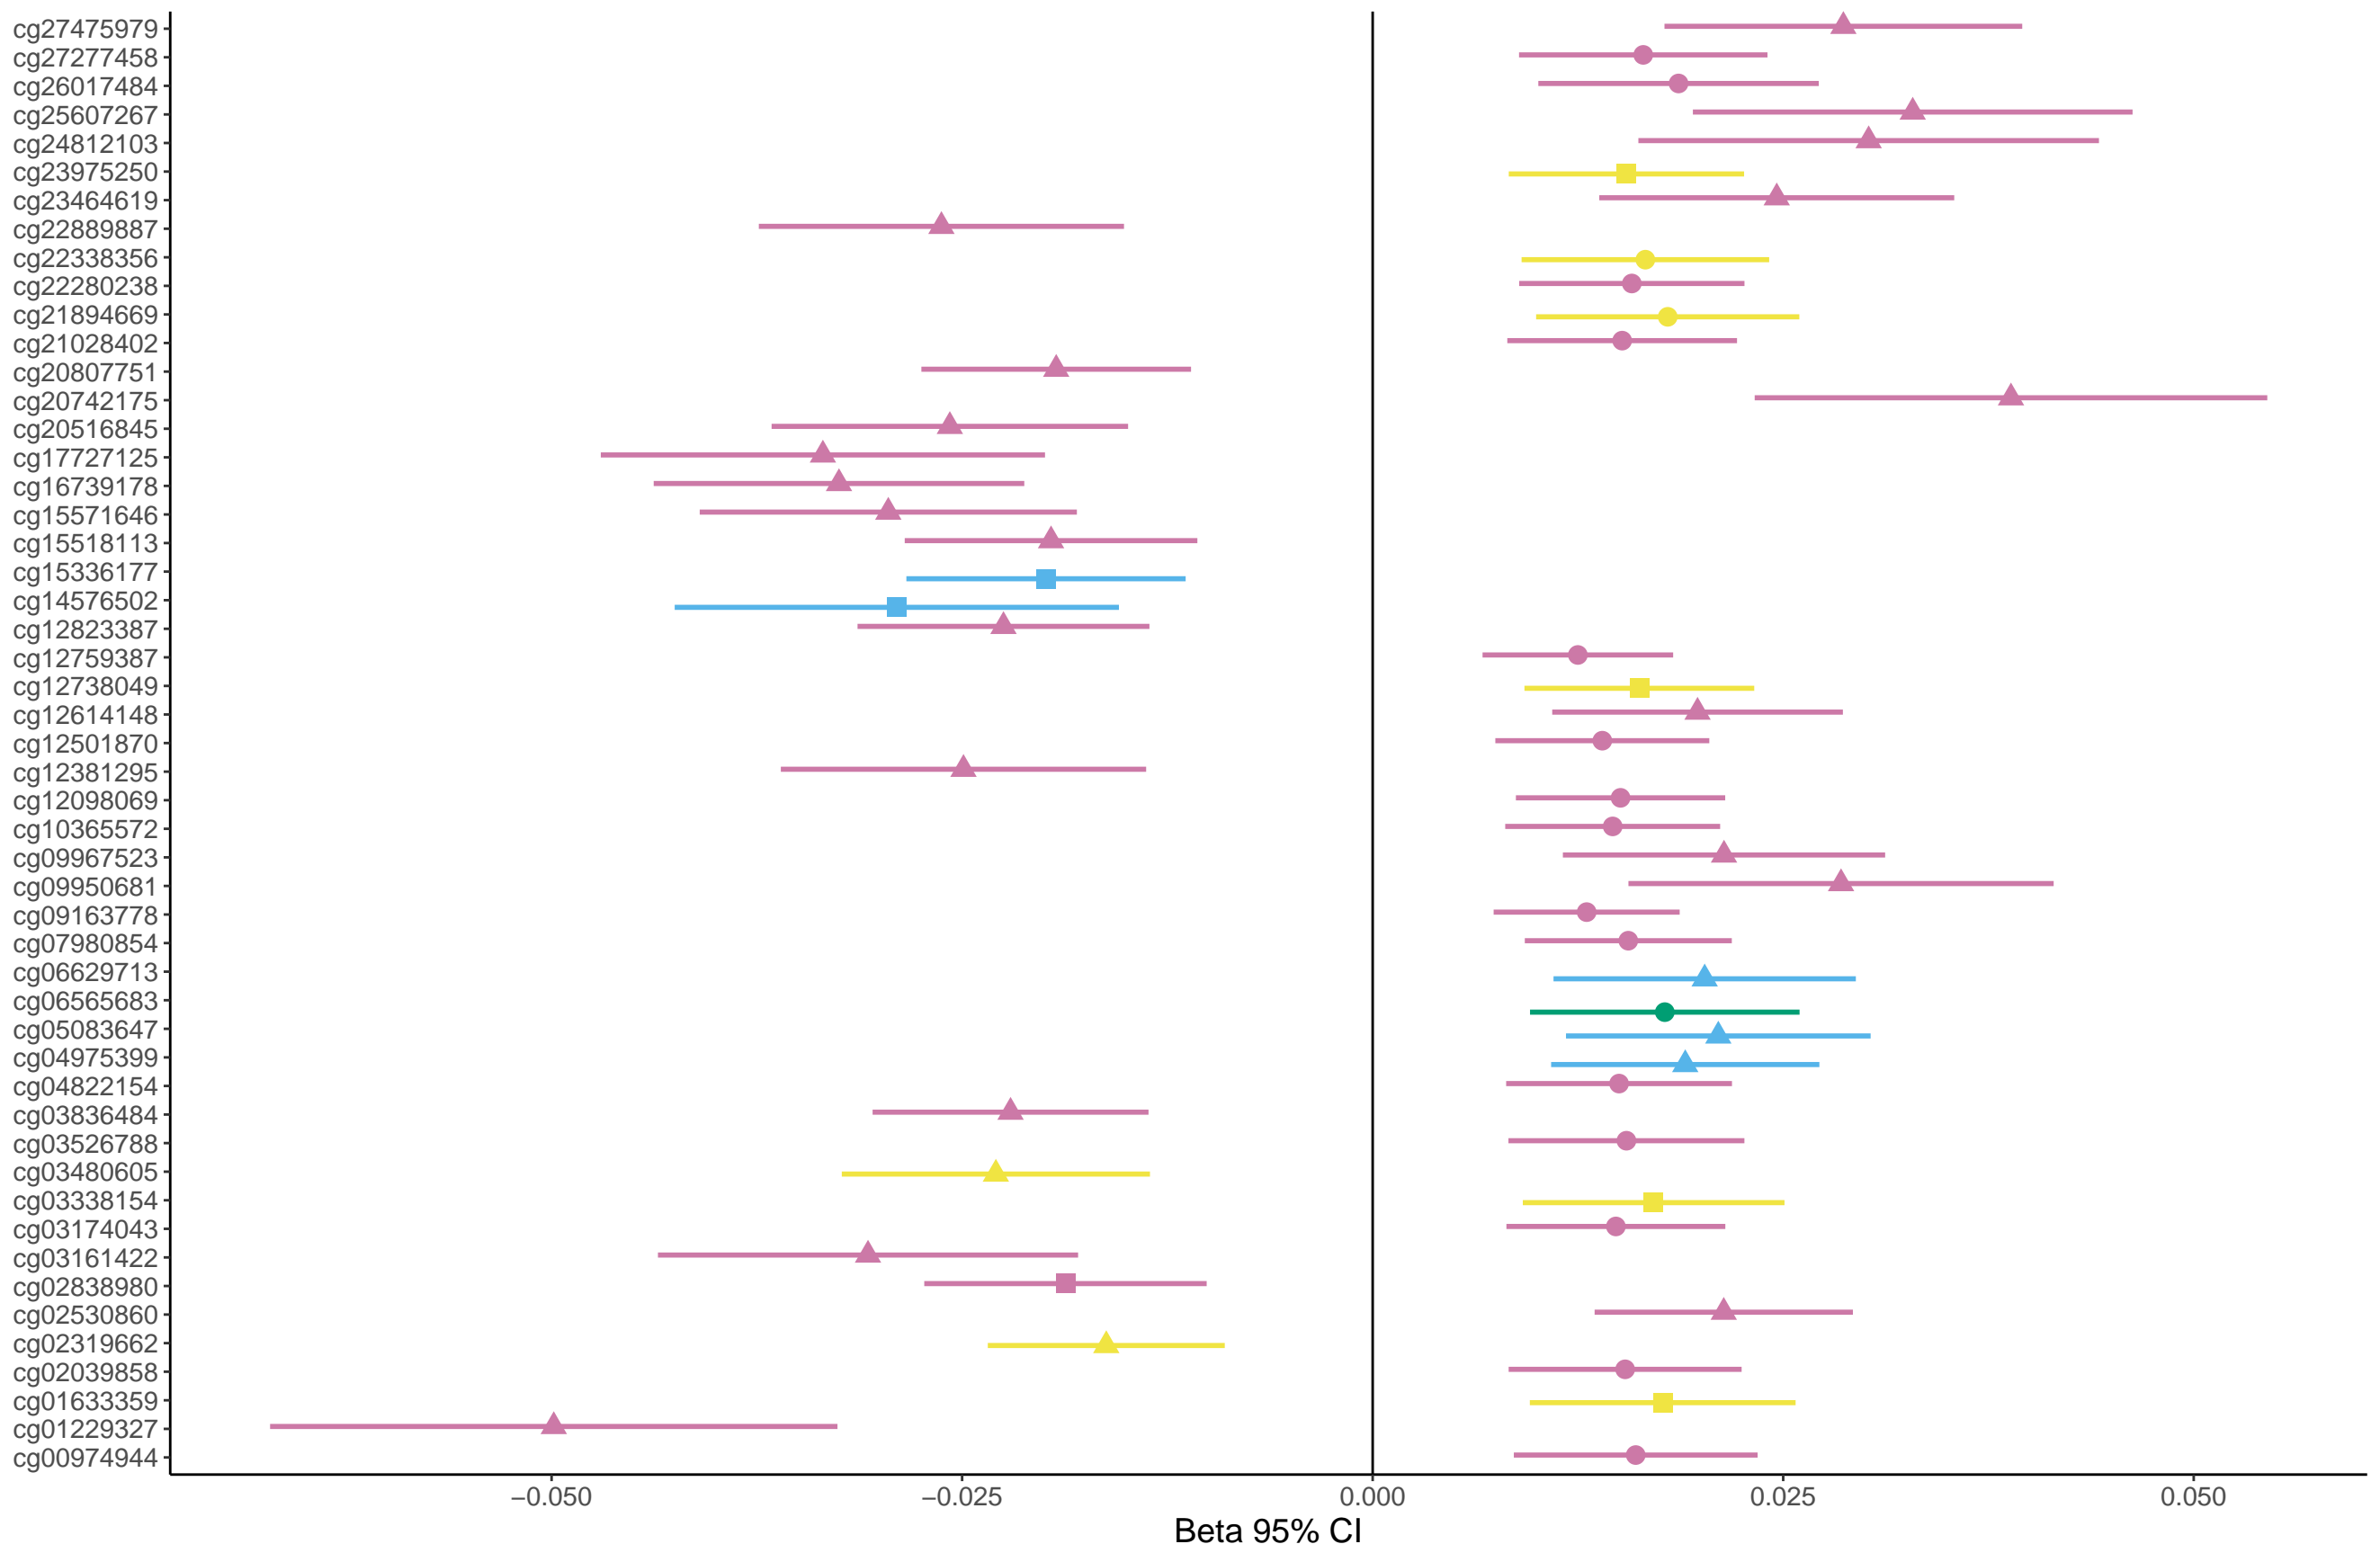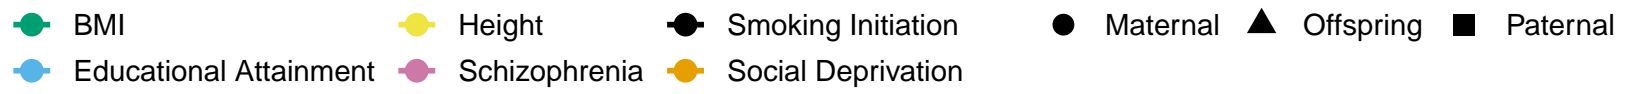

Source: https://medrxiv.org/content/10.1101/2024.04.15.24305824.full.pdf
