1 RUNNING HEAD: Intergenerational transmission and methylation

2 Intergenerational transmission of complex traits and the offspring methylome

3

4 Fiona A. Hagenbeek, PhD<sup>1,2,3,\*</sup>, René Pool, PhD<sup>1,2</sup>, Austin J. Van Asselt, BSc<sup>4</sup>, Erik A. Ehli, PhD<sup>4</sup>, August B.

5 Smit, PhD<sup>5</sup>, Meike Bartels, PhD<sup>1,2</sup>, Jouke Jan Hottenga, PhD<sup>1,2</sup>, Conor V. Dolan, PhD<sup>1,2</sup>, Jenny van

6 Dongen, PhD<sup>1,2,6,‡</sup>, Dorret I. Boomsma, PhD<sup>1,2,6,7,‡</sup>

7

8 <sup>1</sup>Department of Biological Psychology, Vrije Universiteit Amsterdam, Amsterdam, the Netherlands.

9 <sup>2</sup>Amsterdam Public Health (APH) research institute, Amsterdam, the Netherlands.

10 <sup>3</sup>Institute for Molecular Medicine Finland (FIMM), HiLIFE, University of Helsinki, Helsinki, Finland.

11 <sup>4</sup>Avera McKennan Hospital, University Health Center, Sioux Falls, SD, USA.

12 <sup>5</sup>Department of Molecular and Cellular Neurobiology, Center for Neurogenomics and Cognitive

13 Research, Amsterdam Neuroscience, Vrije Universiteit Amsterdam, Amsterdam, the Netherlands.

14 <sup>6</sup>Amsterdam Reproduction & Development (AR&D) research institute, Amsterdam, the Netherlands.

15 <sup>7</sup>Department of Complex Trait Genetics, Center for Neurogenomics and Cognitive Research,

16 Amsterdam Neuroscience, Vrije Universiteit Amsterdam, Amsterdam, the Netherlands.

17 <sup>‡</sup>These authors share last authorship.

18 \*Correspondence: Fiona A. Hagenbeek ([fiona.hagenbeek@helsinki.fi](mailto:fiona.hagenbeek@helsinki.fi)), Institute for Molecular Medicine

19 Finland (FIMM), HiLIFE, University of Helsinki, Tukholmankatu 8, 00290, Helsinki, Finland.

20

21 Word count: 4,711, N tables: 2, N figures: 2

## 22 Abstract

23 The genetic makeup of parents can directly or indirectly affect their offspring phenotype through  
24 genetic transmission or via the environment that is influenced by parental heritable traits. Our  
25 understanding of the mechanisms by which indirect genetic effects operate is limited. Here, we  
26 hypothesize that one mechanism is via the offspring methylome. To test this hypothesis, polygenic  
27 scores (PGSs) for schizophrenia, smoking initiation, educational attainment (EA), social deprivation,  
28 body mass index (BMI), and height were analyzed in a cohort of 1,528 offspring and their parents  
29 (51.5% boys, mean [SD] age = 10 [2.8] years). We modelled parent and offspring PGSs on offspring  
30 buccal-DNA methylation, accounting for the own PGS of offspring, and found significant associations  
31 between parental PGSs for schizophrenia, EA, BMI, and height, and offspring buccal methylation  
32 sites, comprising 16, 2, 1, and 6 sites, respectively ( $\alpha = 2.7 \times 10^{-5}$ ). More DNA methylation sites  
33 were associated with maternal than paternal PGSs, possibly reflecting the maternal pre- and  
34 periconceptual environment or stronger maternal involvement in shaping the offspring's  
35 environment during early childhood.

36 **Keywords:** Intergenerational transmission, DNA methylation, polygenic scores, genetic nurture,  
37 gene-environment correlation, complex human traits

## 38 Introduction

39 Phenotypic resemblance among parents and their biological offspring can be due to both genetic  
40 and environmental influences, with the genetic contribution to phenotypic resemblance manifesting  
41 through different sources. The first source applies to all heritable phenotypes: the Mendelian  
42 transmission of parental alleles to their offspring, resulting in parents and offspring sharing 50% of  
43 their autosomal alleles. A second source is heritable parental behaviors, which shape the  
44 environment of the offspring. Here, the effect of parental genotype on offspring phenotypes is  
45 mediated by parental traits and behavior, contributing to the offspring environment. This source is  
46 denoted “genetic nurture”, because it implies that nurture – the totality of external factors after  
47 conception influenced or created by parents – may have a genetic component [1, 2]. Hence, genetic  
48 nurture arises from the influence of a heritable parental phenotype on the phenotype of their  
49 offspring, which is also known as vertical transmission [3]. Additional forms of indirect genetic  
50 effects can encompass other forms of cultural transmission, such as, horizontal transmission  
51 between individuals of the same generation, such as siblings [4, 5], and ecological inheritance,  
52 involving the transmission of inherited resources and conditions to descendants through niche  
53 construction [6].

54 Several designs can resolve direct genetic effects (the influence of genotype of the offspring  
55 on own phenotype) and indirect genetic effects (the above-mentioned genetic nurture). These  
56 include multi-generation twin-family designs that infer genetic effects from phenotypic resemblance  
57 among family members [7, 8], designs based on measured genetic information, e.g., polygenic scores  
58 (PGSs) [1, 2, 9, 10], or designs that combine these two [11]. Through PGS designs, robust evidence  
59 for genetic nurture effects in offspring educational attainment (EA) has been found [1, 2, 12].

60 The mechanism through which direct genetic effects (Mendelian inheritance) contribute to  
61 variation in human traits is complex, involving a cascade of transcription and translation of genetic  
62 information [13]. Here, we propose to examine DNA methylation as one possible mechanism

63 through which both direct and indirect genetic effects may act. Epigenetic mechanisms such as DNA  
64 methylation modulate gene expression [14], but are themselves subject to both genetic [15, 16] and  
65 environmental influences [17]. Animal studies have shown that early life environmental exposures  
66 like diet, trauma, and social deprivation can induce epigenetic reprogramming in cells. For example,  
67 a classic study of rats found that the quality of maternal care early in life leads to epigenetic  
68 alterations that affect the behavior of offspring into adulthood [18]. Offspring raised by (non-  
69 biological) less-nurturing mothers exhibit increased anxiety as adults, which is attributed to enduring  
70 changes in DNA methylation in the brain. This study was based on cross-fostering experiments in  
71 which pups born to calm biological dams were raised by anxious adoptive dams, and vice versa, to  
72 separate the effect of the environment provided by the mother from genetic transmission [18].

73 In humans, it is more challenging to disentangle the influence of direct genetic transmission  
74 and indirect genetic effects that operate via the environment created by parents. Comprehensive  
75 reviews of childhood psychological adversity and DNA methylation indicated that childhood  
76 maltreatment and other adversities are associated with differential DNA methylation but called for  
77 further study of the impacts of childhood experiences and the effects of genetic transmission of  
78 parental psychopathology risk [19–21]. In the present study, we propose an approach to disentangle  
79 the influence of direct genetic transmission and indirect genetic effects that operate via the  
80 environment created on DNA methylation, by modelling the effects of parental PGSs and offspring  
81 PGSs on the offspring DNA methylation profile [9, 10]. Finding an effect of parental PGSs, in addition  
82 to the effect of the offspring's own PGS, would support the hypothesis that genetic nurture acts  
83 through the offspring methylome. We obtained parental and offspring PGSs for six traits:  
84 schizophrenia, smoking initiation, EA, social deprivation, body mass index (BMI), and height in  
85 nuclear twin families. We focused on schizophrenia, EA, BMI, and height because they have high  
86 powered genome-wide association studies (GWAS). We focused on smoking due to its well-  
87 documented impact on DNA methylation as demonstrated by previous epigenome-wide association  
88 studies (EWAS) [22, 23]. Similarly, we examined social deprivation because of its strong theoretical

89 basis suggesting mediation through epigenetic mechanisms [24]. EWAS have revealed widespread  
90 associations of DNA methylation and schizophrenia [25, 26], smoking [22, 23], and BMI [27, 28].  
91 PGSs for these traits have been associated with DNA methylation [25, 29–31]. However, to date no  
92 studies have been undertaken to separate direct from indirect genetic effects on DNA methylation in  
93 offspring, which requires the PGSs of the offspring and the offspring’s parents.

94 In our study, the epigenetic data were available for 1,528 young twins (51.5% boys, mean [SD]  
95 age = 10 [2.8] years). DNA samples from buccal cells for genotyping and polygenic scoring were  
96 available for the offspring and their parents. DNA methylation was measured by the Illumina  
97 Infinium EPIC array, which measures DNA methylation at approximately 850K sites. To reduce  
98 multiple testing burden, we selected the top 10% most variable probes (72,889). We have shown in  
99 an independent sample of adult Dutch twins that the most variable probes are the most reliable  
100 across time, tissue, and platform [32]. DNA methylation levels in offspring were simultaneously  
101 regressed on offspring, maternal, and paternal PGSs by linear regression, while correcting for familial  
102 clustering.

## 103 Materials and methods

### 104 Study population and procedures

105 The collection of DNA samples in parents and their offspring was done at home from buccal swabs.  
106 Families were recruited from the Netherlands Twin Register (NTR) [33] and the majority took part in  
107 the ACTION Biomarker Study, which recruited twin pairs based on their (dis)similarity for childhood  
108 aggressive behavior [34, 35]. We first collected data in a pilot study to assess the suitability of the  
109 Infinium EPIC array for buccal-derived DNA samples [36] in 96 monozygotic (MZ) twins (47 complete  
110 pairs, 56.2% boys, mean [SD] (range) age at DNA collection 7.4 [2.4] (1-10) years). Next, 1,141 twins  
111 (523 complete pairs, 52.6% boys, mean [SD] (range) age at DNA collection = 9.6 [1.9] (5.6-12.9)  
112 years) and their parents were included in the main ACTION Biomarker Study [37]. A third dataset  
113 included additional twins and siblings in the ACTION Biomarker Study, and unselected MZ twins and

114 triplets from the NTR, totaling 291 children of 1 to 18 years of age (45.7% boys, mean [SD] age at  
115 DNA collection = 12.1 [4.2] years). DNA methylation data and offspring PGSs were available for all  
116 offspring, maternal PGSs were available for 92.1% and paternal PGSs for 81.1% families, with  
117 parental PGS of both biological parents available for 78.3% families (**Supplementary Table 1**). All  
118 families were of European ancestry.

119 Parents gave written informed consent for their own and their offspring's participation. The  
120 study was conducted according to the guidelines of the Declaration of Helsinki. The ACTION project  
121 was assessed by the Central Ethics Committee on Research Involving Human Subjects of the VU  
122 University Medical Center, Amsterdam (NTR 03-180, NTR 25th of May 2007, ACTION 2013/41 and  
123 2014.252), an Institutional Review Board certified by the U.S. Office of Human Research Protections  
124 (IRB number IRB00002991 under Federal-wide Assurance FWA00017598).

#### 125 Infinium MethylationEPIC BeadChip

126 DNA methylation in offspring was assessed with the Infinium MethylationEPIC BeadChip Kit,  
127 following the manufacturer's specification (Illumina, San Diego, CA, USA) [38]. A total of 500 ng of  
128 genomic DNA from buccal swabs were bisulfite-treated using the ZymoResearch EZ DNA Methylation  
129 kit (Zymo Research Corp, Irvine, CA, USA). Datasets 1 and 3 were generated at the Avera McKennan  
130 Hospital (Sioux Falls, SD, USA), and dataset 2 at the Human Genotyping Facility (HugeF) of  
131 ErasmusMC (Rotterdam, the Netherlands; <http://www.glimdna.org/>).

132 As previously described [36, 39], quality control (QC) and normalization of the methylation  
133 data were performed with the pipelines developed by the Biobank-based Integrative Omics Study  
134 (BIOS) consortium [40]. The probe  $\beta$ -values represent the ratio of the methylated signal intensity to  
135 total signal intensity (methylated plus unmethylated) at a given CpG site and can range from 0  
136 (unmethylated) to 1 (fully methylated). Only samples that passed all five quality criteria of MethylAid  
137 were retained [41]. In addition, these samples were characterized by correct genetic relationships  
138 among the participants (omicsPrint) [42] and the absence of sex mismatches (DNAMArray and

139 meffil) [43]. Functional normalization was performed with the dataset-specific optimum number of  
140 principal components. Methylation probes were coded as missing, if they had an intensity value of  
141 zero, bead count < 3, or detection p-value > 0.01. A probe was excluded if it overlapped with a SNP  
142 or Insertion/Deletion (INDEL), mapped to multiple locations in the genome, or had a success rate <  
143 0.95 across all samples. Sample QC, probe filtering, normalization, and imputation of missing values  
144 were done within the three datasets separately. Of 865,859 sites on the array, 789,888 sites,  
145 787,711 sites, and 734,807 sites were retained after QC in datasets 1, 2, and 3, respectively, and we  
146 retained the 728,899 overlapping sites. Cellular proportions were predicted in epithelial tissues  
147 based on the cell-type deconvolution algorithm Hierarchical Epigenetic Dissection of Intra-Sample-  
148 Heterogeneity (HepiDISH) with the reduced partial correlation [44]. After QC, we removed all cross-  
149 reactive probes, probes in SNPs or on the X or Y chromosome and then imputed missing methylation  
150  $\beta$ -values (up to 5%; probes with higher missingness were excluded) with the `imputePCA()` function  
151 (`missMDA` R in the BIOS pipeline). Next, we removed methylation outliers (range: 291-505) that  
152 exceeded three times the interquartile range (`ewaff` R) [45] in each dataset. We then combined the  
153 methylation  $\beta$ -values from all three imputed datasets and obtained residual methylation levels by  
154 regressing the effects of sex, age, percentages of epithelial and natural killer cells, EPIC array row,  
155 and bisulfite sample plate. In the combined dataset of imputed and residualized DNA methylation  
156 sites, we calculated the top 10% most variable methylation sites (72,889) to retain for further  
157 analysis (**Supplementary Figure 1, Supplementary Table 2**).

## 158 Genotyping and calculation of polygenic scores

159 Genotyping was done according to the manufacturer's protocols in 3,124 NTR samples on multiple  
160 genotyping platforms. Sample and SNP QC was performed per genotyping platform (build 37) for all  
161 individuals in the NTR. Genotype data were imputed to 1000 genomes phase 3 (v.5) [46] and a  
162 combined HRC 1.1 (EGA version) [47, 48] and GONL (v.4) [49] reference panel. The first was the basis  
163 for calculation of genetic principal components (PCs) and the second for calculation of PGSs. More

164 details on QC and imputation are included in **Supplementary Note 1** and on calculation of genetic  
165 PCs in **Supplementary Note 2**.

166 Parental and offspring PGSs for schizophrenia [50], smoking initiation [51], educational  
167 attainment [52], social deprivation [53], BMI [54], and height [54] were calculated based on GWASs,  
168 that all omitted NTR from the discovery (meta-)analysis. Before generating the PGSs, QC steps  
169 involved removing SNPs with Hardy-Weinberg equilibrium (HWE) p-values below 0.00001,  
170 Mendelian error rates above 1%, genotype call rate below 98%, effect allele frequencies below 0.01  
171 and above 0.99, imputation info below 0.10 and SNPs showing over 2% differences in allele  
172 frequencies between genotyping platforms. We retained 7,086,504 (schizophrenia), 6,982,922  
173 (smoking initiation), 7,118,026 (EA), 6,997,217 (social deprivation), 2,220,360 (BMI), and 2,206,961  
174 (height) SNPs.

175 LD-weighted betas were calculated from the processed summary statistics in the LDpred  
176 package (v.0.9) to correct for the effects of LD, and to maximize predictive accuracy of the PGS [55].  
177 We randomly selected 2,500 individuals unrelated to the 2<sup>nd</sup> degree from the NTR as a reference  
178 population to obtain LD patterns in an NTR genotype subset of well imputed variants. Weights to  
179 obtain the PGSs in PLINK2 (--score) [56] were calculated with an LD pruning window of 250 KB and  
180 the infinitesimal prior (LDpred-inf). We calculated the offspring, maternal, and paternal PGS for the 6  
181 traits (18 PGSs total). Two dummy coded genotyping platforms and the first 10 genetic PCs were  
182 regressed on the PGSs. The standardized residuals (unit variance and zero means) were analyzed. If  
183 maternal or paternal polygenic scores were missing, we applied mean imputation (i.e., imputed the  
184 parental PGS with zero) [2] ( $N_{dataset1} = 31$ ;  $N_{dataset2} = 213$ ;  $N_{dataset3} = 87$ ).

## 185 Analyses

186 As shown in Okbay et al. (2022) [9] (see also **Supplementary Note 3**), models that include the PGSs  
187 from offspring and two parents provide estimates of direct and indirect genetic effects, and allow for  
188 differences in maternal and paternal indirect genetic effects [9, 10].



189 Direct and indirect genetic effects for a single trait can be estimated by fitting the following  
190 regression model:

$$191 Y_{ij} = \mu + \delta PGS_{ij} + \alpha_m PGS_{m(i)} + \alpha_p PGS_{p(i)} + \epsilon_{ij}, \quad (1)$$

192 where  $Y_{ij}$  is the residualized methylation probe  $\beta$ -value, and  $i$  and  $j$  index family and individual;  
193  $\mu$  is the intercept,  $\delta$  is the direct effect of the offspring PGS;  $\alpha_m$  captures the maternal indirect  
194 genetic effects;  $\alpha_p$  captures the paternal indirect genetic effects;  $PGS_{m(i)}$  and  $PGS_{p(i)}$  are the PGSs of  
195 the mother and father in family  $i$ ; and  $\epsilon_{ij}$  is a residual term.

196 We extended equation 1 by including maternal, paternal, and offspring PGS for multiple traits.  
197 This allows for the unbiased estimation of the direct and indirect genetic effects for a given complex  
198 trait, while accounting for direct and indirect effects on all other traits in the model.

199 The direct and indirect genetic effects for multiple traits are modelled as follows:

$$200 Y_{ij} = \mu + \delta PGS_{ij}^{trait\ 1} + \alpha_m PGS_{m(i)}^{trait\ 1} + \alpha_p PGS_{p(i)}^{trait\ 1} + \dots + \delta PGS_{ij}^{trait\ N} + \\ 201 \alpha_m PGS_{m(i)}^{trait\ N} + \alpha_p PGS_{p(i)}^{trait\ N} + \beta_1 Cov_{ij} + \beta_2 Cov_{ij} + \epsilon_{ij}, \quad (2)$$

202 where subscript trait 1 through trait N indicates the trait for which the standardized residual  
203 polygenic score was calculated and  $Cov_{ij}$  and  $Cov_{ij}$  indicate the DNA methylation dataset.

204 We tested the association between the 72,889 CpGs and the offspring, maternal, and paternal  
205 PGSs for the six traits simultaneously (equation 2), i.e., 18 predictors, using Generalized Estimation  
206 Equation (GEE) regression modeling to correct the standard errors for family clustering of individuals  
207 [57]. All analyses were carried out in R (version 4.2.2) [58] in the R package 'gee' (version 4.13-26)  
208 [59]. A Bonferroni correction was applied for the number of independent DNA methylation probes  
209 tested ( $\alpha = 0.05/N$  independent variables), following the procedure outlined by Nyholt (2004) [60],  
210 where the number of independent tests is determined by Matrix Spectral Decomposition (MSD) of  
211 the imputed CpGs. The correlated CpGs could be reduced to 1,850 independent linear combinations

212 of the probes and we set the significance level to  $(0.05/1,850) = 2.7 \times 10^{-5}$ . When analyzing the  
213 72,889 CpGs, the regression model for 192 CpGs did not converge. We present the results for the  
214 remaining 72,697 successful analyses.

215 Significant CpGs from these analyses were followed up in four analyses. First, we queried the  
216 EWAS Atlas database to identify with which traits these CpGs had been previously associated [61].  
217 Second, we queried the GoDMC database (<http://mqtldb.godmc.org.uk/>) for associated blood *cis*  
218 and *trans* methylation quantitative trait loci (mQTLs) for these CpGs [15] and examined if the  
219 identified mQTLs were mapped to genome-wide significant ( $p < 5 \times 10^{-8}$ ) SNPs for the respective  
220 traits. Third, we investigated whether the DNA methylation levels in buccal cells and prefrontal  
221 cortex were significantly correlated (Spearman rank correlations at False Discovery Rate (FDR)  $q <$   
222 0.05) in a published dataset of matched post-mortem samples ( $N = 120$ ) [62]. Fourth, we performed  
223 a look-up of the genes annotated to the significantly associated CpGs to investigate whether they  
224 are protein expressing in the human dorsal lateral prefrontal cortex and if so, whether these  
225 proteins are differentially regulated in schizophrenia [63]. Last, we performed trait enrichment  
226 analyses of the top 100 most significant sites identified in the mega-analysis for each PGS and  
227 complex trait in the EWAS Atlas.

## 228 Results

229 Participant characteristics are described in **Table 1**. We analyzed data from 1,528 offspring and their  
230 parents (51.5% boys, mean [SD] age = 10 [2.8] years) to test the simultaneous association of  
231 offspring, maternal, and paternal PGSs for six complex traits with 72,697 buccal DNA methylation  
232 sites in offspring. The correlations between PGSs of different traits ranged from -0.29 and 0.23  
233 (mean = -0.004, median = -0.01), with the strongest correlation observed between the Maternal  
234 PGSs of smoking initiation and EA (**Figure 1**). We accounted for these correlations by fitting the PGSs  
235 of all traits simultaneously in one model. The correlations between the offspring and parental PGSs  
236 for the same trait were approximately 0.5 as expected (range = 0.43-0.53, mean = 0.48, median =

237 0.47), while correlations between parental PGSs for the same trait were on average 0.04 (median =  
238 0.04, range = -0.02-0.10).

239 We observed independent significant associations between offspring methylation sites and  
240 maternal PGSs for schizophrenia (15), height (2), and BMI (1), and paternal PGSs for schizophrenia  
241 (1), EA (2), and height (4), (**Figure 2, Table 2**), demonstrating a mechanism for indirect effects from  
242 parental phenotype to the offspring methylome. The own offspring PGSs for schizophrenia, EA, and  
243 height showed associations with 21, 3, and 2 offspring methylation sites, respectively. None of the  
244 CpGs associated with maternal, paternal, or offspring PGSs overlapped. Thus, in total, 25 and 26  
245 significant CpG sites ( $p < 2.7 \times 10^{-5}$ , Bonferroni correction for 1,850 tests) were associated with  
246 indirect and direct genetic effects across the six complex traits, respectively (**Supplementary Figures**  
247 **2-7, Supplementary Table 3**).

248 The query of the EWAS Atlas database [61] for the 37 CpGs associated with direct or indirect  
249 genetic effects for schizophrenia showed that 12 CpGs (5 associated with the maternal and 7 with  
250 the offspring PGS) had known trait associations, though not with schizophrenia or other mental  
251 health traits (**Table 2**). Similarly, 3 out of the 5 CpGs associated with paternal (2) or offspring (3)  
252 PGSs for EA and 3 out of the 8 CpGs associated with maternal (2), paternal (4), or offspring (2) PGSs  
253 for height were included in the EWAS Atlas but showed no previous associations with the respective  
254 or a related complex trait. Trait enrichment analyses for the top 100 CpGs associated with offspring  
255 and parental PGSs for all six complex traits showed enrichment for 5 to 18 traits per PGS (mean =  
256 10.2, median = 10) with on average 2.2 CpGs associated per trait (range = 1-7, median = 2,  
257 **Supplementary Table 4**). Notably, many of the enriched traits are phenotypically associated with the  
258 relevant PGSs, such as enrichment for bipolar and major depressive disorder and maternal  
259 hypertensive disorders in pregnancy for CpGs associated with maternal indirect genetic effects for  
260 schizophrenia and household socioeconomic status in childhood for CpGs with direct and indirect  
261 genetic effects for schizophrenia.

262 A query of the GoDMC blood mQTL database [15] with the 51 significant CpGs identified 3,237  
263 *cis* mQTLs for 16 CpGs (mean = 202.3 mQTLs per associated CpG, median = 170.5) associated with  
264 schizophrenia (13 CpGs), EA (1), and height (2), with roughly half (1,639/3,237) of the mQTLs  
265 associated with indirect genetic effect CpGs (**Table 2, Supplementary Table 5**). Of the 164 mQTLs  
266 associated with cg01633359 (paternal PGS for height) and 216 of the mQTLs associated with  
267 cg03480605 (offspring PGS for height) 56 and 17, respectively, had previously been associated with  
268 height at genome-wide significant levels ( $p < 5 \times 10^{-8}$ , **Table 2, Supplementary Figure 8,**  
269 **Supplementary Table 6**) [54]. None of the mQTLs for the schizophrenia and EA associated CpGs  
270 were previously found to be significantly associated with their respective traits at genome-wide  
271 significant levels [50, 52].

272 We looked at CpGs significantly associated with direct or indirect genetic effects in a published  
273 dataset ( $N = 120$ ) of correlations between DNA methylation levels in buccal cells and the prefrontal  
274 cortex [62]. One CpG associated with the maternal PGS for schizophrenia (cg09163778,  $r = 0.31$ ,  $p =$   
275  $5.86 \times 10^{-4}$ ), 2 CPGs associated with the offspring PGS for schizophrenia (cg02530860,  $r = 0.67$ ,  $p =$   
276  $7.51 \times 10^{-17}$ , cg01229327,  $r = 0.49$ ,  $p = 1.91 \times 10^{-8}$ ), and one CpG associated with the paternal PGS for  
277 height (cg01633359,  $r = 0.29$ ,  $p = 1.44 \times 10^{-3}$ ) showed significantly (FDR  $q < 0.05$ ) correlated DNA  
278 methylation levels between buccal cells and the prefrontal cortex (**Supplementary Table 7**). Because  
279 of the relatively large number of CpGs associated with schizophrenia PGSs, we performed further  
280 follow-up analyses on the differential regulation in schizophrenia of the proteins encoded by the 29  
281 genes annotated to these CpGs. Of these genes, 9 genes had protein expression detected in the  
282 dorsal lateral prefrontal cortex (dlPFC) and 2 of those (*PRKDC* and *NCALD*) were significantly  
283 differentially regulated in schizophrenia (**Supplementary Table 8**). Neither gene was annotated to a  
284 CpG associated with the offspring or parental PGS for schizophrenia, rather *PRKDC* was annotated to  
285 cg22338356 (chr8:48739161) which was associated with the maternal PGS for height, and *NCALD*  
286 was annotated to cg14576502 (chr8:102962279) which was associated with the paternal PGS for EA.

## 287 Discussion

288 We investigated direct and indirect genetic influences on offspring DNA methylation for  
289 schizophrenia, smoking initiation, EA, social deprivation, BMI, and height in a cohort of 1,528  
290 children and their parents. We identified 37 CpGs significantly associated with schizophrenia, 5 with  
291 EA, 1 with BMI, and 8 with height. None of the identified CpGs overlapped between polygenic  
292 scores. We found the strongest genetic nurture effect for schizophrenia. Of the schizophrenia  
293 associated CpGs, 43% (16 CpGs, 93.7% maternal) showed an association with parental PGSs. Overall,  
294 the maternal genetic nurture effect for schizophrenia (15 CpGs) on offspring DNA methylation  
295 represented 83.3% of all maternal genetic nurture effects (18 CpGs) and 58% of all genetic nurture  
296 effects (25 CpGs).

297 We identified 25 CpGs associated with parental PGSs. These results indicate that one  
298 mechanism for genetic nurture is via the offspring methylome, though the relation of the identified  
299 CpGs with offspring outcomes remains to be determined. Of these, 18 CpGs were specific to  
300 associations with maternal PGSs, and 7 were specific to paternal PGSs, suggesting that genetically  
301 driven paternal behaviors have a smaller impact on offspring DNA methylation. The larger number of  
302 CpGs associated with maternal PGSs for schizophrenia (15/16 CpGs) is consistent with a stronger  
303 influence of genetic nurture effects on offspring DNA methylation in utero. This aligns with the  
304 "Developmental Origins of Health and Disease" (DOHaD) hypothesis, that prenatal environmental  
305 factors have long-term effects through epigenetic mechanisms [64]. Unfavorable intrauterine  
306 conditions leading to poor fetal growth are particularly relevant to the DOHaD hypothesis [65, 66].  
307 Observational studies indicate that the intrauterine environment is influenced by maternal height  
308 and weight, and both direct and maternal indirect genetic effects affect offspring birth length,  
309 weight, and gestational age [67, 68]. The CpGs associated with maternal PGSs for height (2 CpGs)  
310 and BMI (1 CpG) may be involved in these processes. However, recent research suggests that the  
311 impact of intrauterine growth restriction on complex disease risk is limited, and that non-

312 transmitted maternal genetic factors for birth weight do not contribute to offspring disease risk  
313 beyond genetic pleiotropy with offspring genetic factors [69]. This aligns with our finding that the  
314 largest number of findings for non-transmitted maternal genetic factors is not for body size but for  
315 schizophrenia. Most CpGs associated with indirect genetic effects were observed for maternal PGSs,  
316 particularly for schizophrenia. This observation may result from both pre-and postnatal exposures,  
317 including rearing environment and maternal parenting behaviors. One direction for further research  
318 is to examine DNA methylation in neonatal samples to better isolate prenatal from postnatal effects.

319 Several of the CpG sites associated with the offspring and parental PGSs for schizophrenia  
320 annotate to genes implicated in neurodevelopmental and immune processes (**Table 2,**  
321 **Supplementary Table 8**), consistent with the pathophysiology of schizophrenia [70, 71]. For  
322 instance, *PTPRG* (cg00974944) and *PCDH1* (cg10365572), both associated with the maternal  
323 schizophrenia PGS, are involved in cell growth regulation and neural adhesion, respectively,  
324 supporting the role of dysregulated synaptic processes in schizophrenia risk [50]. Similarly, *CCHCR1*  
325 (cg09163778, associated with maternal schizophrenia PGS), located within the major  
326 histocompatibility complex (MHC) region, is of particular interest due to the MHC's established role  
327 in immune regulation and its prior associations with schizophrenia [72].

328 For EA, several genes associated with CpG sites suggest mechanisms related to neuronal  
329 signaling and synaptic plasticity (**Table 2, Supplementary Table 8**). For example, *NCALD*  
330 (cg14576502, associated with the paternal PGS for EA), a gene encoding a calcium-binding protein  
331 involved in G-protein-coupled receptor signal transduction, may influence cognitive functions  
332 through its regulatory role in calcium signaling, a key process in synaptic activity and plasticity [73].  
333 We also observed significant regulation of *NCALD* protein expression in the dlPFC in schizophrenia.

334 For height, several CpG sites annotate to genes related to growth, metabolism, and cellular  
335 signaling (**Table 2, Supplementary Table 8**). *GRB14* (cg21894669, associated with maternal PGS for  
336 height), encodes a growth factor receptor-binding protein that regulates insulin receptor signaling.

337 By modulating receptor tyrosine kinase activity, particularly in insulin pathways, it likely influences  
338 growth and metabolism. Additionally, *PRKDC* (cg22338356, associated with the maternal PGS for  
339 height), one of the two genes with significantly regulated protein expression in the dlPFC in  
340 schizophrenia, is highly expressed in immune cells and mutations have been linked to autoimmune  
341 diseases and increased immune response [74]. This connection between immune system regulation,  
342 schizophrenia, and height reflects previous findings from GWAS studies [75].

343 We did not model a relation of the identified CpGs with offspring outcomes, but explored the  
344 literature to determine whether the significant CpGs for each trait had been associated with the PGS  
345 for that trait and found that none of the CpGs significantly associated with direct or indirect genetic  
346 effects had been associated with polygenic scores for schizophrenia or BMI [25, 29–31]. These  
347 previous studies all comprised adults, whereas our study focused on children. The previous studies  
348 on schizophrenia mainly comprised adult patient populations focused on DNA methylation in blood  
349 or post-mortem brain samples ( $N$  range = 88-847). DNA methylation is often tissue specific and  
350 despite identifying blood *cis* mQTLs for approximately one-third of the CpGs associated with direct  
351 and indirect genetic effects, some *cis* mQTLs are not found in blood. Aside from tissue-specificity,  
352 the lack of overlap between CpGs associated in buccal and blood *cis* mQTLs might reflect  
353 differences in DNA methylation arrays. Previously, we found that 46.3% of buccal mQTLs as  
354 measured on the Illumina EPIC array overlap with blood mQTLs as measured on the Illumina 450K  
355 array when 15,897 of 33,749 EPIC sites were present on the 450K [36]. As blood and buccal *cis*  
356 mQTLs have a high (71%) concordance, we expect to have identified most *cis* mQTLs [76]. None of  
357 the identified CpGs were associated with *trans* mQTLs. Three CpGs associated with schizophrenia  
358 PGSs (1 maternal, 2 offspring) and one CpG associated with paternal PGS for height showed  
359 correlated methylation levels between buccal cells and prefrontal cortex brain samples [62]. Future  
360 studies should investigate direct and indirect genetic effects in multiple tissues relevant to health  
361 outcomes to better understand tissue-specific versus tissue-agnostic DNA methylation signatures.

362           This study is the first to test if indirect genetic effects influence DNA methylation in offspring.  
363           It also explored the direct genetic effects on DNA methylation in children. We analyzed data from  
364           1,528 children and their parents. Most children were related to at least one other person in the  
365           sample, such as their co-twin and thus the effective sample size is smaller than 1,528. Given the  
366           sample size, we took three measures to reduce the multiple testing burden. First, we focused on the  
367           top 10% most variable CpGs, which have been shown to be the most reliable [32]. Second, we  
368           adjusted our multiple testing threshold based on the number of independent CpGs, considering the  
369           high correlations between them. Third, our approach of modeling multiple complex traits  
370           simultaneously allowed us to avoid correcting for the number of traits investigated, which would  
371           have been necessary in a separate modeling strategy. By limiting our investigation to highly variable  
372           CpGs, we cannot draw conclusions on less variable CpGs or CpGs with strong temporal patterns.  
373           Overall, our application highlights its potential to investigate epigenetic mechanisms of indirect  
374           genetic effects and encourages testing in large family cohorts, across different tissues, and  
375           populations.

376           In summary, we found support for the hypothesis that indirect genetic effects are associated  
377           with DNA methylation in offspring. By simultaneously modelling multiple complex traits, we found  
378           robust associations of indirect genetic effects on offspring DNA methylation for schizophrenia, EA,  
379           BMI, and height, but not smoking initiation and social deprivation. Most of these associations were  
380           discovered in relation to maternal PGSs, consistent with the interpretation that the prenatal  
381           environment influences the DNA methylation of offspring during embryonic development or reflect  
382           a stronger maternal influence on the offspring's environment during the pre- and perinatal period  
383           and early childhood.



## 384 Declarations

## 385 Acknowledgments

386 The Netherlands Twin Register (NTR) warmly thanks all twin families for their participation and are  
387 grateful to all researchers involved in the data collection for the ACTION Biomarker Study.  
388 Additionally, we thank Cato Romero, MSc. for feedback during the revision of this manuscript. The  
389 current work is supported by the Consortium on Individual Development (CID) and the “Aggression  
390 in Children: Unraveling gene-environment interplay to inform Treatment and InterventiON  
391 strategies” project (ACTION). CID is funded through the Gravitation Program of the Dutch Ministry of  
392 Education, Culture, and Science and the Netherlands Organization for Scientific Research (NWO  
393 grant number 024-001-003). ACTION received funding from the European Union Seventh Framework  
394 Program (FP7/2007-2013) under grant agreement no 602768. M.B. is supported by an ERC  
395 consolidator grant (WELL-BEING 771057, PI Bartels) and NWO VICI grant (VI.C.2111.054, PI Bartels).  
396 J.D. acknowledges the NWO-funded X-omics project (184.034.019) and D.I.B. the Royal Netherlands  
397 Academy of Arts and Sciences Professor Award (PAH/6635).

## 398 Conflict of Interest

399 The authors declare that the research was conducted in the absence of any commercial or financial  
400 relationships that could be construed as a potential conflict of interest.

## 401 Authors' contributions

402 Conceptualization, F.A.H., R.P., J.J.H., C.V.D., J.D. and D.I.B.; methodology, C.V.D; formal analysis,  
403 F.A.H., R.P. and A.B.S.; investigation, F.A.H., M.B. and D.I.B.; resources, R.P., A.J.V.A., E.A.E., J.J.H. and  
404 J.D.; writing—original draft preparation, F.A.H., R.P., J.J.H., C.V.D., J.D. and D.I.B.; writing—review  
405 and editing, F.A.H., R.P., A.J.V.A., A.B.S., M.B., J.J.H., C.V.D., J.D. and D.I.B.; visualization, F.A.H. and  
406 C.V.D.; supervision, J.D. and D.I.B.; funding acquisition, M.B. and D.I.B. All authors have read and  
407 agreed to the published version of the manuscript.

408 Availability of data and code

409 The standardized protocol for large scale collection of buccal-cell (and urine) samples in the home

410 situation as developed for the ACTION Biomarker Study in children is available at

411 <https://dx.doi.org/10.17504/protocols.io.eq2ly7qkwlx9/v1>. The data of the Netherlands Twin

412 Register (NTR) may be accessed, upon approval of the data access committee, through the NTR

413 (<https://ntr-data-request.psy.vu.nl/>). The pipeline for DNA methylation–array analysis developed by

414 the Biobank-based Integrative Omics Study (BIOS) consortium is available at

415 [https://molepi.github.io/DNAMArray\\_workflow/](https://molepi.github.io/DNAMArray_workflow/) (<https://doi.org/10.5281/zenodo.3355292>). All

416 software used to perform the analyses are available online. All scripts used to run the analyses

417 (empirical and simulated) are available at our GitHub

418 (<https://github.com/FionaAHagenbeek/MethylationPGS>).

## 419 References

- 420 1. Bates TC, Maher BS, Medland SE, McAloney K, Wright MJ, Hansell NK, et al. The Nature of  
421 Nurture: Using a Virtual-Parent Design to Test Parenting Effects on Children’s Educational  
422 Attainment in Genotyped Families. *Twin Research and Human Genetics*. 2018;21:73–83.
- 423 2. Kong A, Thorleifsson G, Frigge ML, Vilhjalmsdottir BJ, Young AI, Thorgeirsson TE, et al. The nature  
424 of nurture: Effects of parental genotypes. *Science*. 2018;359:424–428.
- 425 3. Balbona JV, Kim Y, Keller MC. Estimation of Parental Effects Using Polygenic Scores. *Behav*  
426 *Genet*. 2021;51:264–278.
- 427 4. Cavalli-Sforza LL, Feldman MW. Cultural transmission and evolution: a quantitative approach.  
428 *Monogr Popul Biol*. 1981;16:1–388.
- 429 5. Eaves LJ. A model for sibling effects in man. *Heredity*. 1976;36:205–214.
- 430 6. Odling-Smee J, Laland KN. Ecological Inheritance and Cultural Inheritance: What Are They and  
431 How Do They Differ? *Biol Theory*. 2011;6:220–230.
- 432 7. McAdams TA, Cheesman R, Ahmadzadeh YI. Annual Research Review: Towards a deeper  
433 understanding of nature and nurture: combining family-based quasi-experimental methods  
434 with genomic data. *Journal of Child Psychology and Psychiatry*. 2023;64:693–707.
- 435 8. Swagerman SC, van Bergen E, Dolan C, de Geus EJC, Koenis MMG, Hulshoff Pol HE, et al.  
436 Genetic transmission of reading ability. *Brain and Language*. 2017;172:3–8.
- 437 9. Okbay A, Wu Y, Wang N, Jayashankar H, Bennett M, Nehzati SM, et al. Polygenic prediction of  
438 educational attainment within and between families from genome-wide association analyses in  
439 3 million individuals. *Nat Genet*. 2022;54:437–449.
- 440 10. Tubbs JD, Porsch RM, Cherny SS, Sham PC. The Genes We Inherit and Those We Don’t:  
441 Maternal Genetic Nurture and Child BMI Trajectories. *Behav Genet*. 2020;50:310–319.
- 442 11. Bruins S, Dolan CV, Boomsma DI. The Power to Detect Cultural Transmission in the Nuclear  
443 Twin Family Design With and Without Polygenic Risk Scores and in the Transmitted–  
444 Nontransmitted (Alleles) Design. *Twin Res Hum Genet*. 2020;23:265–270.

- 445 12. Wang B, Baldwin JR, Schoeler T, Cheesman R, Barkhuizen W, Dudbridge F, et al. Robust genetic  
446 nurture effects on education: A systematic review and meta-analysis based on 38,654 families  
447 across 8 cohorts. *The American Journal of Human Genetics*. 2021;108:1780–1791.
- 448 13. Buescher JM, Driggers EM. Integration of omics: more than the sum of its parts. *Cancer &*  
449 *Metabolism*. 2016;4:4.
- 450 14. Carlberg C, Molnár F. What Is Epigenomics? In: Carlberg C, Molnár F, editors. *Human*  
451 *Epigenomics*, Singapore: Springer; 2018. p. 3–18.
- 452 15. Min JL, Hemani G, Hannon E, Dekkers KF, Castillo-Fernandez J, Luijk R, et al. Genomic and  
453 phenotypic insights from an atlas of genetic effects on DNA methylation. *Nat Genet*.  
454 2021;53:1311–1321.
- 455 16. van Dongen J, Nivard MG, Willemsen G, Hottenga J-J, Helmer Q, Dolan CV, et al. Genetic and  
456 environmental influences interact with age and sex in shaping the human methylome. *Nat*  
457 *Commun*. 2016;7:11115.
- 458 17. Zhou FC, Resendiz M, Lo C-L. Chapter 31 - Environmental Influence of Epigenetics. In: Tollefsbol  
459 TO, editor. *Handbook of Epigenetics (Second Edition)*, Academic Press; 2017. p. 477–494.
- 460 18. Weaver ICG, Cervoni N, Champagne FA, D’Alessio AC, Sharma S, Seckl JR, et al. Epigenetic  
461 programming by maternal behavior. *Nat Neurosci*. 2004;7:847–854.
- 462 19. Cecil CAM, Zhang Y, Nolte T. Childhood maltreatment and DNA methylation: A systematic  
463 review. *Neuroscience & Biobehavioral Reviews*. 2020;112:392–409.
- 464 20. Parade SH, Huffhines L, Daniels TE, Stroud LR, Nugent NR, Tyrka AR. A systematic review of  
465 childhood maltreatment and DNA methylation: candidate gene and epigenome-wide  
466 approaches. *Transl Psychiatry*. 2021;11:1–33.
- 467 21. Rubens M, Bruenig D, Adams JAM, Suresh SM, Sathyanarayanan A, Haslam D, et al. Childhood  
468 maltreatment and DNA methylation: A systematic review. *Neuroscience & Biobehavioral*  
469 *Reviews*. 2023;147:105079.

- 470 22. Christiansen C, Castillo-Fernandez JE, Domingo-Relloso A, Zhao W, El-Sayed Moustafa JS, Tsai  
471 P-C, et al. Novel DNA methylation signatures of tobacco smoking with trans-ethnic effects.  
472 *Clinical Epigenetics*. 2021;13:36.
- 473 23. van Dongen J, Willemsen G, BIOS Consortium, de Geus EJ, Boomsma DI, Neale MC. Effects of  
474 smoking on genome-wide DNA methylation profiles: A study of discordant and concordant  
475 monozygotic twin pairs. *eLife*. 2023;12:e83286.
- 476 24. Szyf M, McGowan P, Meaney MJ. The social environment and the epigenome. *Environmental  
477 and Molecular Mutagenesis*. 2008;49:46–60.
- 478 25. Hannon E, Dempster E, Viana J, Burrage J, Smith AR, Macdonald R, et al. An integrated genetic-  
479 epigenetic analysis of schizophrenia: evidence for co-localization of genetic associations and  
480 differential DNA methylation. *Genome Biology*. 2016;17:176.
- 481 26. Montano C, Taub MA, Jaffe A, Briem E, Feinberg JI, Trygvadottir R, et al. Association of DNA  
482 Methylation Differences With Schizophrenia in an Epigenome-Wide Association Study. *JAMA  
483 Psychiatry*. 2016;73:506–514.
- 484 27. Dick KJ, Nelson CP, Tsaprouni L, Sandling JK, Aïssi D, Wahl S, et al. DNA methylation and body-  
485 mass index: a genome-wide analysis. *The Lancet*. 2014;383:1990–1998.
- 486 28. Vehmeijer FOL, Küpers LK, Sharp GC, Salas LA, Lent S, Jima DD, et al. DNA methylation and  
487 body mass index from birth to adolescence: meta-analyses of epigenome-wide association  
488 studies. *Genome Medicine*. 2020;12:105.
- 489 29. Kiltchewskij DJ, Reay WR, Geaghan MP, Atkins JR, Xavier A, Zhang X, et al. Alteration of DNA  
490 Methylation and Epigenetic Scores Associated With Features of Schizophrenia and Common  
491 Variant Genetic Risk. *Biological Psychiatry*. 2023. 2023.  
492 <https://doi.org/10.1016/j.biopsych.2023.07.010>.
- 493 30. Viana J, Hannon E, Dempster E, Pidsley R, Macdonald R, Knox O, et al. Schizophrenia-associated  
494 methylomic variation: molecular signatures of disease and polygenic risk burden across  
495 multiple brain regions. *Human Molecular Genetics*. 2017;26:210–225.

- 496 31. Yu C, Hodge AM, Wong EM, Joo JE, Makalic E, Schmidt DF, et al. Does genetic predisposition  
497 modify the effect of lifestyle-related factors on DNA methylation? *Epigenetics*. 2022;17:1838–  
498 1847.
- 499 32. Van Asselt AJ, Beck JJ, Finnicum CT, Johnson BN, Kallsen N, Hottenga JJ, et al. Genome-Wide  
500 DNA Methylation Profiles in Whole-Blood and Buccal Samples—Cross-Sectional, Longitudinal,  
501 and across Platforms. *International Journal of Molecular Sciences*. 2023;24:14640.
- 502 33. Ligthart L, Beijsterveldt CEM van, Kevenaar ST, Zeeuw E de, Bergen E van, Bruins S, et al. The  
503 Netherlands Twin Register: Longitudinal Research Based on Twin and Twin-Family Designs.  
504 *Twin Research and Human Genetics*. 2019;22:623–636.
- 505 34. Bartels M, Hendriks A, Mauri M, Krapohl E, Whipp A, Bolhuis K, et al. Childhood aggression and  
506 the co-occurrence of behavioural and emotional problems: results across ages 3–16 years from  
507 multiple raters in six cohorts in the EU-ACTION project. *Eur Child Adolesc Psychiatry*.  
508 2018;27:1105–1121.
- 509 35. Hagenbeek FA, Roetman PJ, Pool R, Kluft C, Harms AC, van Dongen J, et al. Urinary Amine and  
510 Organic Acid Metabolites Evaluated as Markers for Childhood Aggression: The ACTION  
511 Biomarker Study. *Frontiers in Psychiatry*. 2020;11.
- 512 36. van Dongen J, Ehli EA, Jansen R, van Beijsterveldt CEM, Willemsen G, Hottenga JJ, et al.  
513 Genome-wide analysis of DNA methylation in buccal cells: a study of monozygotic twins and  
514 mQTLs. *Epigenetics & Chromatin*. 2018;11:54.
- 515 37. Hagenbeek FA, Dongen J van, Roetman PJ, Ehli EA, Bartels M, Vermeiren RRJM, et al. ACTION  
516 Biomarker Study. *Protocols*. 2023. March 2023.  
517 <https://dx.doi.org/10.17504/protocols.io.eq2ly7qkwlx9/v1>.
- 518 38. Moran S, Arribas C, Esteller M. Validation of a DNA methylation microarray for 850,000 CpG  
519 sites of the human genome enriched in enhancer sequences. *Epigenomics*. 2016;8:389–399.

- 520 39. van Dongen J, Hagenbeek FA, Suderman M, Roetman PJ, Sugden K, Chiocchetti AG, et al. DNA  
521 methylation signatures of aggression and closely related constructs: A meta-analysis of  
522 epigenome-wide studies across the lifespan. *Mol Psychiatry*. 2021;26:2148–2162.
- 523 40. Sinke L, van Iterson M, Cats D, Slieker R, Heijmans B. DNAmArray: Streamlined workflow for  
524 the quality control, normalization, and analysis of Illumina methylation array data. 2019.
- 525 41. van Iterson M, Tobi EW, Slieker RC, den Hollander W, Luijk R, Slagboom PE, et al. MethylAid:  
526 visual and interactive quality control of large Illumina 450k datasets. *Bioinformatics*.  
527 2014;30:3435–3437.
- 528 42. van Iterson M, Cats D, Hop P, BIOS Consortium, Heijmans BT. omicsPrint: detection of data  
529 linkage errors in multiple omics studies. *Bioinformatics*. 2018;34:2142–2143.
- 530 43. Min JL, Hemani G, Davey Smith G, Relton C, Suderman M. Meffil: efficient normalization and  
531 analysis of very large DNA methylation datasets. *Bioinformatics*. 2018;34:3983–3989.
- 532 44. Zheng SC, Webster AP, Dong D, Feber A, Graham DG, Sullivan R, et al. A novel cell-type  
533 deconvolution algorithm reveals substantial contamination by immune cells in saliva, buccal  
534 and cervix. *Epigenomics*. 2018;10:925–940.
- 535 45. Suderman, Matthew, Sharp, Gemma, Yousefi, Paul, Kupers, Leanne. perishky/ewaff: Efficient  
536 and Flexible EWAS version 0.0.2 from GitHub. 2019.
- 537 46. Auton A, Abecasis GR, Altshuler DM, Durbin RM, Abecasis GR, Bentley DR, et al. A global  
538 reference for human genetic variation. *Nature*. 2015;526:68–74.
- 539 47. McCarthy S, Das S, Kretzschmar W, Delaneau O, Wood AR, Teumer A, et al. A reference panel  
540 of 64,976 haplotypes for genotype imputation. *Nat Genet*. 2016;48:1279–1283.
- 541 48. The Haplotype Reference Consortium - EGA European Genome-Phenome Archive. [https://ega-](https://ega-archive.org/studies/EGAS00001001710)  
542 [archive.org/studies/EGAS00001001710](https://ega-archive.org/studies/EGAS00001001710). Accessed 6 April 2023.
- 543 49. Boomsma DI, Wijmenga C, Slagboom EP, Swertz MA, Karssen LC, Abdellaoui A, et al. The  
544 Genome of the Netherlands: design, and project goals. *Eur J Hum Genet*. 2014;22:221–227.

- 545 50. Trubetsky V, Pardiñas AF, Qi T, Panagiotaropoulou G, Awasthi S, Bigdeli TB, et al. Mapping  
546 genomic loci implicates genes and synaptic biology in schizophrenia. *Nature*. 2022;604:502–  
547 508.
- 548 51. Liu M, Jiang Y, Wedow R, Li Y, Brazel DM, Chen F, et al. Association studies of up to 1.2 million  
549 individuals yield new insights into the genetic etiology of tobacco and alcohol use. *Nat Genet*.  
550 2019;51:237–244.
- 551 52. Lee JJ, Wedow R, Okbay A, Kong E, Maghziyan O, Zacher M, et al. Gene discovery and polygenic  
552 prediction from a genome-wide association study of educational attainment in 1.1 million  
553 individuals. *Nat Genet*. 2018;50:1112–1121.
- 554 53. Hill WD, Hagenaars SP, Marioni RE, Harris SE, Liewald DCM, Davies G, et al. Molecular Genetic  
555 Contributions to Social Deprivation and Household Income in UK Biobank. *Current Biology*.  
556 2016;26:3083–3089.
- 557 54. Yengo L, Sidorenko J, Kemper KE, Zheng Z, Wood AR, Weedon MN, et al. Meta-analysis of  
558 genome-wide association studies for height and body mass index in ~700000 individuals of  
559 European ancestry. *Hum Mol Genet*. 2018;27:3641–3649.
- 560 55. Vilhjálmsson BJ, Yang J, Finucane HK, Gusev A, Lindström S, Ripke S, et al. Modeling Linkage  
561 Disequilibrium Increases Accuracy of Polygenic Risk Scores. *The American Journal of Human  
562 Genetics*. 2015;97:576–592.
- 563 56. Chang CC, Chow CC, Tellier LC, Vattikuti S, Purcell SM, Lee JJ. Second-generation PLINK: rising  
564 to the challenge of larger and richer datasets. *GigaScience*. 2015;4:s13742-015-0047–0048.
- 565 57. Rogers P, Stoner J. Modification of the Sandwich Estimator in Generalized Estimating Equations  
566 with Correlated Binary Outcomes in Rare Event and Small Sample Settings. *American Journal of  
567 Applied Mathematics and Statistics*. 2018;3:243–251.
- 568 58. R Core Team. *R: A Language and Environment for Statistical Computing*. Vienna, Austria: R  
569 Foundation for Statistical Computing; 2022.
- 570 59. Carey VJ. *gee: Generalized Estimation Equation Solver*. 2022.



- 571 60. Nyholt DR. A Simple Correction for Multiple Testing for Single-Nucleotide Polymorphisms in  
572 Linkage Disequilibrium with Each Other. *Am J Hum Genet.* 2004;74:765–769.
- 573 61. Xiong Z, Yang F, Li M, Ma Y, Zhao W, Wang G, et al. EWAS Open Platform: integrated data,  
574 knowledge and toolkit for epigenome-wide association study. *Nucleic Acids Research.*  
575 2022;50:D1004–D1009.
- 576 62. Sommerer Y, Ohlei O, Dobricic V, Oakley DH, Wesse T, Sedghpour Sabet S, et al. A correlation  
577 map of genome-wide DNA methylation patterns between paired human brain and buccal  
578 samples. *Clinical Epigenetics.* 2022;14:139.
- 579 63. Koopmans F, Dijkstra AA, Li W-P, Klaassen RV, Gouwenberg Y, Yao S, et al. Human brain  
580 prefrontal cortex proteomics identifies compromised energy metabolism and neuronal  
581 function in Schizophrenia. *In preparation.*
- 582 64. Langley-Evans SC, McMullen S. Developmental Origins of Adult Disease. *Medical Principles and*  
583 *Practice.* 2010;19:87–98.
- 584 65. Barker DJP. Fetal origins of coronary heart disease. *BMJ.* 1995;311:171–174.
- 585 66. Barker DJP. Fetal origins of cardiovascular disease. *Annals of Medicine.* 1999;31:3–6.
- 586 67. Eaves LJ, Pourcain BSt, Smith GD, York TP, Evans DM. Resolving the Effects of Maternal and  
587 Offspring Genotype on Dyadic Outcomes in Genome Wide Complex Trait Analysis (“M-GCTA”).  
588 *Behav Genet.* 2014;44:445–455.
- 589 68. Zhang G, Bacelis J, Lengyel C, Teramo K, Hallman M, Helgeland Ø, et al. Assessing the Causal  
590 Relationship of Maternal Height on Birth Size and Gestational Age at Birth: A Mendelian  
591 Randomization Analysis. *PLoS Med.* 2015;12:e1001865.
- 592 69. Leinonen JT, Pirinen M, Tukiainen T. Disentangling the link between maternal influences on  
593 birth weight and disease risk in 36,211 genotyped mother–child pairs. *Commun Biol.*  
594 2024;7:175.
- 595 70. Kato H, Kimura H, Kushima I, Takahashi N, Aleksic B, Ozaki N. The genetic architecture of  
596 schizophrenia: review of large-scale genetic studies. *J Hum Genet.* 2023;68:175–182.

- 597 71. Sullivan PF, Yao S, Hjerling-Leffler J. Schizophrenia genomics: genetic complexity and functional  
598 insights. *Nat Rev Neurosci*. 2024;25:611–624.
- 599 72. Sekar A, Bialas AR, de Rivera H, Davis A, Hammond TR, Kamitaki N, et al. Schizophrenia risk  
600 from complex variation of complement component 4. *Nature*. 2016;530:177–183.
- 601 73. Chindemi G, Abdellah M, Amsalem O, Benavides-Piccione R, Delattre V, Doron M, et al. A  
602 calcium-based plasticity model for predicting long-term potentiation and depression in the  
603 neocortex. *Nat Commun*. 2022;13:3038.
- 604 74. Sun X, Liu T, Zhao J, Xia H, Xie J, Guo Y, et al. DNA-PK deficiency potentiates cGAS-mediated  
605 antiviral innate immunity. *Nat Commun*. 2020;11:6182.
- 606 75. Romero C, Leeuw C de, Schipper M, Maciel B de APC, Heuvel MP van den, Brouwer RM, et al.  
607 Genetic overlap between schizophrenia and height implicates pituitary and immune response.  
608 2024:2024.04.10.24305626.
- 609 76. Ohlei O, Sommerer Y, Dobricic V, Homann J, Deecke L, Schilling M, et al. Genome-wide QTL  
610 mapping across three tissues highlights several Alzheimer’s and Parkinson’s disease loci  
611 potentially acting via DNA methylation. 2023:2023.12.22.23300365.
- 612
- 613

614 **Figure legends**

615 **Figure 1.** Pearson correlations among the offspring, maternal, and paternal polygenic scores for  
616 schizophrenia, smoking initiation, educational attainment, social deprivation, body mass index (BMI),  
617 and height.

618 **Figure 2.** Buccal CpGs significantly associated ( $\alpha = 2.7 \times 10^{-5}$ ) with maternal ( $\square$ ), paternal ( $\square$ ), or  
619 offspring ( $\Delta$ ) polygenic scores for schizophrenia, educational attainment, body mass index (BMI), and  
620 height.

621 **Tables**

622 **Table 1.** Demographics of the individuals included across the three buccal DNA methylation datasets in this study.

|                                         | <b>MZ</b>          | <b>DZ</b>            | <b>Triplets</b>    | <b>Siblings</b>     | <b>Total<sup>a</sup></b> |
|-----------------------------------------|--------------------|----------------------|--------------------|---------------------|--------------------------|
| <i>N</i> (complete twin pairs or trios) | 1,170 (538)        | 209 (99)             | 34 (9)             | 115                 | 1,528                    |
| Mean ( <i>SD</i> ) [range] age          | 9.8 (2.7) [1 – 18] | 9.9 (1.7) [5.7 – 13] | 7.7 (5.6) [2 - 17] | 11.9 (2.6) [5 - 17] | 10 (2.8) [1 - 18]        |
| <i>N</i> (%) males                      | 614 (52.5%)        | 101 (48.3%)          | 18 (52.9%)         | 54 (47%)            | 787 (51.5%)              |

623 <sup>a</sup> Parental polygenic scores for one or both parents were missing for 331 children, these parental PGS were mean imputed.

624 Note, MZ = monozygotic twins, DZ = dizygotic twins.

625

626 **Table 2.** Buccal CpGs significantly associated ( $\alpha = 2.7 \times 10^{-5}$ ) with maternal, paternal, or offspring polygenic scores for schizophrenia, educational  
 627 attainment (EA), body mass index (BMI), and height.

| PGS                     | CpG        | CHR:BP <sup>a</sup> | Gene <sup>b</sup>    | mQTLs | SNPs | Complex traits                                                                            |
|-------------------------|------------|---------------------|----------------------|-------|------|-------------------------------------------------------------------------------------------|
| Maternal Schizophrenia  | cg00974944 | 3:61649924          | <i>PTPRG</i>         |       |      |                                                                                           |
| Maternal Schizophrenia  | cg02039858 | 14:65828769         |                      |       |      |                                                                                           |
| Maternal Schizophrenia  | cg03174043 | 2:20548412          |                      | 185   |      | fractional exhaled nitric oxide                                                           |
| Maternal Schizophrenia  | cg03526788 | 8:130899478         | <i>FAM49B</i>        |       |      |                                                                                           |
| Maternal Schizophrenia  | cg04822154 | 8:124692680         |                      |       |      |                                                                                           |
| Maternal Schizophrenia  | cg07980854 | 20:57586338         |                      | 634   |      | breast cancer; type 2 diabetes; atopy; psoriasis                                          |
| Maternal Schizophrenia  | cg09163778 | 6:31125417          | <i>TCF19; CCHCR1</i> |       |      |                                                                                           |
| Maternal Schizophrenia  | cg10365572 | 5:141245930         | <i>PCDH1</i>         |       |      |                                                                                           |
| Maternal Schizophrenia  | cg12098069 | 13:42537172         | <i>VWA8-AS1</i>      |       |      |                                                                                           |
| Maternal Schizophrenia  | cg12501870 | 8:81803721          |                      | 182   |      |                                                                                           |
| Maternal Schizophrenia  | cg12759387 | 1:27849177          |                      | 177   |      | systemic lupus erythematosus; polychlorinated biphenyls exposure                          |
| Maternal Schizophrenia  | cg21028402 | 6:113932902         |                      | 297   |      | helicobacter pylori infection; oral squamous cell carcinoma                               |
| Maternal Schizophrenia  | cg22280238 | 17:79251323         | <i>SLC38A10</i>      |       |      |                                                                                           |
| Maternal Schizophrenia  | cg26017484 | 1:3322309           | <i>PRDM16</i>        |       |      | adenoma                                                                                   |
| Maternal Schizophrenia  | cg27277458 | 10:63597194         |                      |       |      |                                                                                           |
| Paternal Schizophrenia  | cg02838980 | 16:10402487         |                      |       |      |                                                                                           |
| Offspring Schizophrenia | cg01229327 | 19:54311998         | <i>NLRP12</i>        |       |      |                                                                                           |
| Offspring Schizophrenia | cg02530860 | 8:144371537         |                      | 646   |      | gender; sperm viability; assisted reproduction technology; infant sex; sexually dimorphic |
| Offspring Schizophrenia | cg03161422 | 4:175256045         |                      |       |      |                                                                                           |
| Offspring Schizophrenia | cg03836484 | 10:25349182         | <i>ENKUR</i>         |       |      |                                                                                           |
| Offspring Schizophrenia | cg09950681 | 11:393392           | <i>PKP3</i>          |       |      |                                                                                           |
| Offspring Schizophrenia | cg09967523 | 18:18943072         | <i>GREB1L</i>        |       |      |                                                                                           |
| Offspring Schizophrenia | cg12381295 | 20:3880297          | <i>PANK2</i>         |       |      | gingivo-buccal oral squamous cell carcinoma (OSCC-GB)                                     |

| PGS                     | CpG        | CHR:BP <sup>a</sup> | Gene <sup>b</sup>                      | mQTLs | SNPs | Complex traits                                                                                                                                                                                        |
|-------------------------|------------|---------------------|----------------------------------------|-------|------|-------------------------------------------------------------------------------------------------------------------------------------------------------------------------------------------------------|
| Offspring Schizophrenia | cg12614148 | 1:118325026         |                                        | 98    |      |                                                                                                                                                                                                       |
| Offspring Schizophrenia | cg12823387 | 1:214614656         | <i>PTPN14</i>                          |       |      |                                                                                                                                                                                                       |
| Offspring Schizophrenia | cg15518113 | 1:167400121         | <i>CD247</i>                           | 105   |      | Air pollution (NO <sub>2</sub> ); adrenocortical carcinoma; smoking; multiple sclerosis;                                                                                                              |
| Offspring Schizophrenia | cg15571646 | 2:238767351         | <i>RAMP1</i>                           |       |      |                                                                                                                                                                                                       |
| Offspring Schizophrenia | cg16739178 | 16:85470674         |                                        | 50    |      | papillary thyroid carcinoma; aging; BMI; Crohn's disease; Behcet's disease; maternal hypertensive disorders in pregnancy; gestational age; blood C-reactive protein level; inflammatory bowel disease |
| Offspring Schizophrenia | cg17727125 | 8:38441156          |                                        |       |      |                                                                                                                                                                                                       |
| Offspring Schizophrenia | cg20516845 | 21:43823604         | <i>UBASH3A</i>                         | 140   |      |                                                                                                                                                                                                       |
| Offspring Schizophrenia | cg20742175 | 20:57267357         | <i>NPEPL1</i> ;<br><i>STX16-NPEPL1</i> |       |      | high risk cutaneous squamous cell carcinoma (cSCC)                                                                                                                                                    |
| Offspring Schizophrenia | cg20807751 | 9:84025287          |                                        |       |      |                                                                                                                                                                                                       |
| Offspring Schizophrenia | cg22889887 | 11:113433931        |                                        | 6     |      |                                                                                                                                                                                                       |
| Offspring Schizophrenia | cg23464619 | 13:95513506         |                                        | 50    |      | hepatocellular carcinoma; colorectal laterally spreading tumor; inflammatory bowel disease; ulcerative colitis                                                                                        |
| Offspring Schizophrenia | cg24812103 | 8:101735630         | <i>PABPC1</i>                          | 244   |      | prenatal arsenic exposure; gestational diabetes mellitus; inflammatory bowel disease                                                                                                                  |
| Offspring Schizophrenia | cg25607267 | 12:122362708        | <i>WDR66</i>                           |       |      |                                                                                                                                                                                                       |
| Offspring Schizophrenia | cg27475979 | 16:89471039         | <i>ANKRD11</i>                         |       |      |                                                                                                                                                                                                       |
| Paternal EA             | cg14576502 | 8:102962279         | <i>NCALD</i>                           |       |      | recurrent adult-type IDH-mutant gliomas                                                                                                                                                               |
| Paternal EA             | cg15336177 | 1:99369228          | <i>LPPR5</i>                           |       |      |                                                                                                                                                                                                       |
| Offspring EA            | cg04975399 | 1:67822225          | <i>IL12RB2</i>                         |       |      | fractional exhaled nitric oxide                                                                                                                                                                       |
| Offspring EA            | cg05083647 | 1:204897364         | <i>NFASC</i>                           |       |      |                                                                                                                                                                                                       |
| Offspring EA            | cg06629713 | 2:60580559          |                                        | 43    |      | primary Sjogren's Syndrome; obesity; Type 2 diabetes; asthma; atopy; Crohn's disease; fractional exhaled nitric oxide; hepatitis B virus-related liver disease progression                            |
| Maternal BMI            | cg06565683 | 20:46817989         |                                        |       |      |                                                                                                                                                                                                       |
| Maternal Height         | cg21894669 | 2:165379442         | <i>GRB14</i>                           |       |      |                                                                                                                                                                                                       |
| Maternal Height         | cg22338356 | 8:48739161          | <i>PRKDC</i>                           |       |      | Down Syndrome; Fetal alcohol spectrum disorder                                                                                                                                                        |

| PGS              | CpG        | CHR:BP <sup>a</sup> | Gene <sup>b</sup> | mQTLs | SNPs | Complex traits                                          |
|------------------|------------|---------------------|-------------------|-------|------|---------------------------------------------------------|
| Paternal Height  | cg01633359 | 5:33439359          |                   | 164   | 56   |                                                         |
| Paternal Height  | cg03338154 | 6:41121714          | TREML1            |       |      |                                                         |
| Paternal Height  | cg12738049 | 15:76509692         | ETFA              |       |      |                                                         |
| Paternal Height  | cg23975250 | 22:44757380         |                   |       |      | sexually dimorphic                                      |
| Offspring Height | cg02319662 | 4:108127694         |                   |       |      |                                                         |
| Offspring Height | cg03480605 | 7:151038446         | NUB1              | 216   | 17   | maternal smoking; obesity; oral squamous cell carcinoma |

628 <sup>a</sup>CHR:BP = Chromosome base pair location in genome build 37. <sup>b</sup>Gene = NCBI gene summaries and Ensembl links are added to **Supplementary Table 8**. mQTLs  
 629 = number of blood *cis* methylation quantitative trait loci (mQTLs) [15] associated with the CpGs. SNPs = number of genome-wide significant ( $p < 5 \times 10^{-8}$ )  
 630 SNPs overlapping with blood *cis* mQTLs for the CpGs. Complex traits = complex traits previously associated with the CpGs in the EWAS Atlas [61].

It is made available under a [CC-BY-NC-ND 4.0 International license](https://creativecommons.org/licenses/by-nc-nd/4.0/).

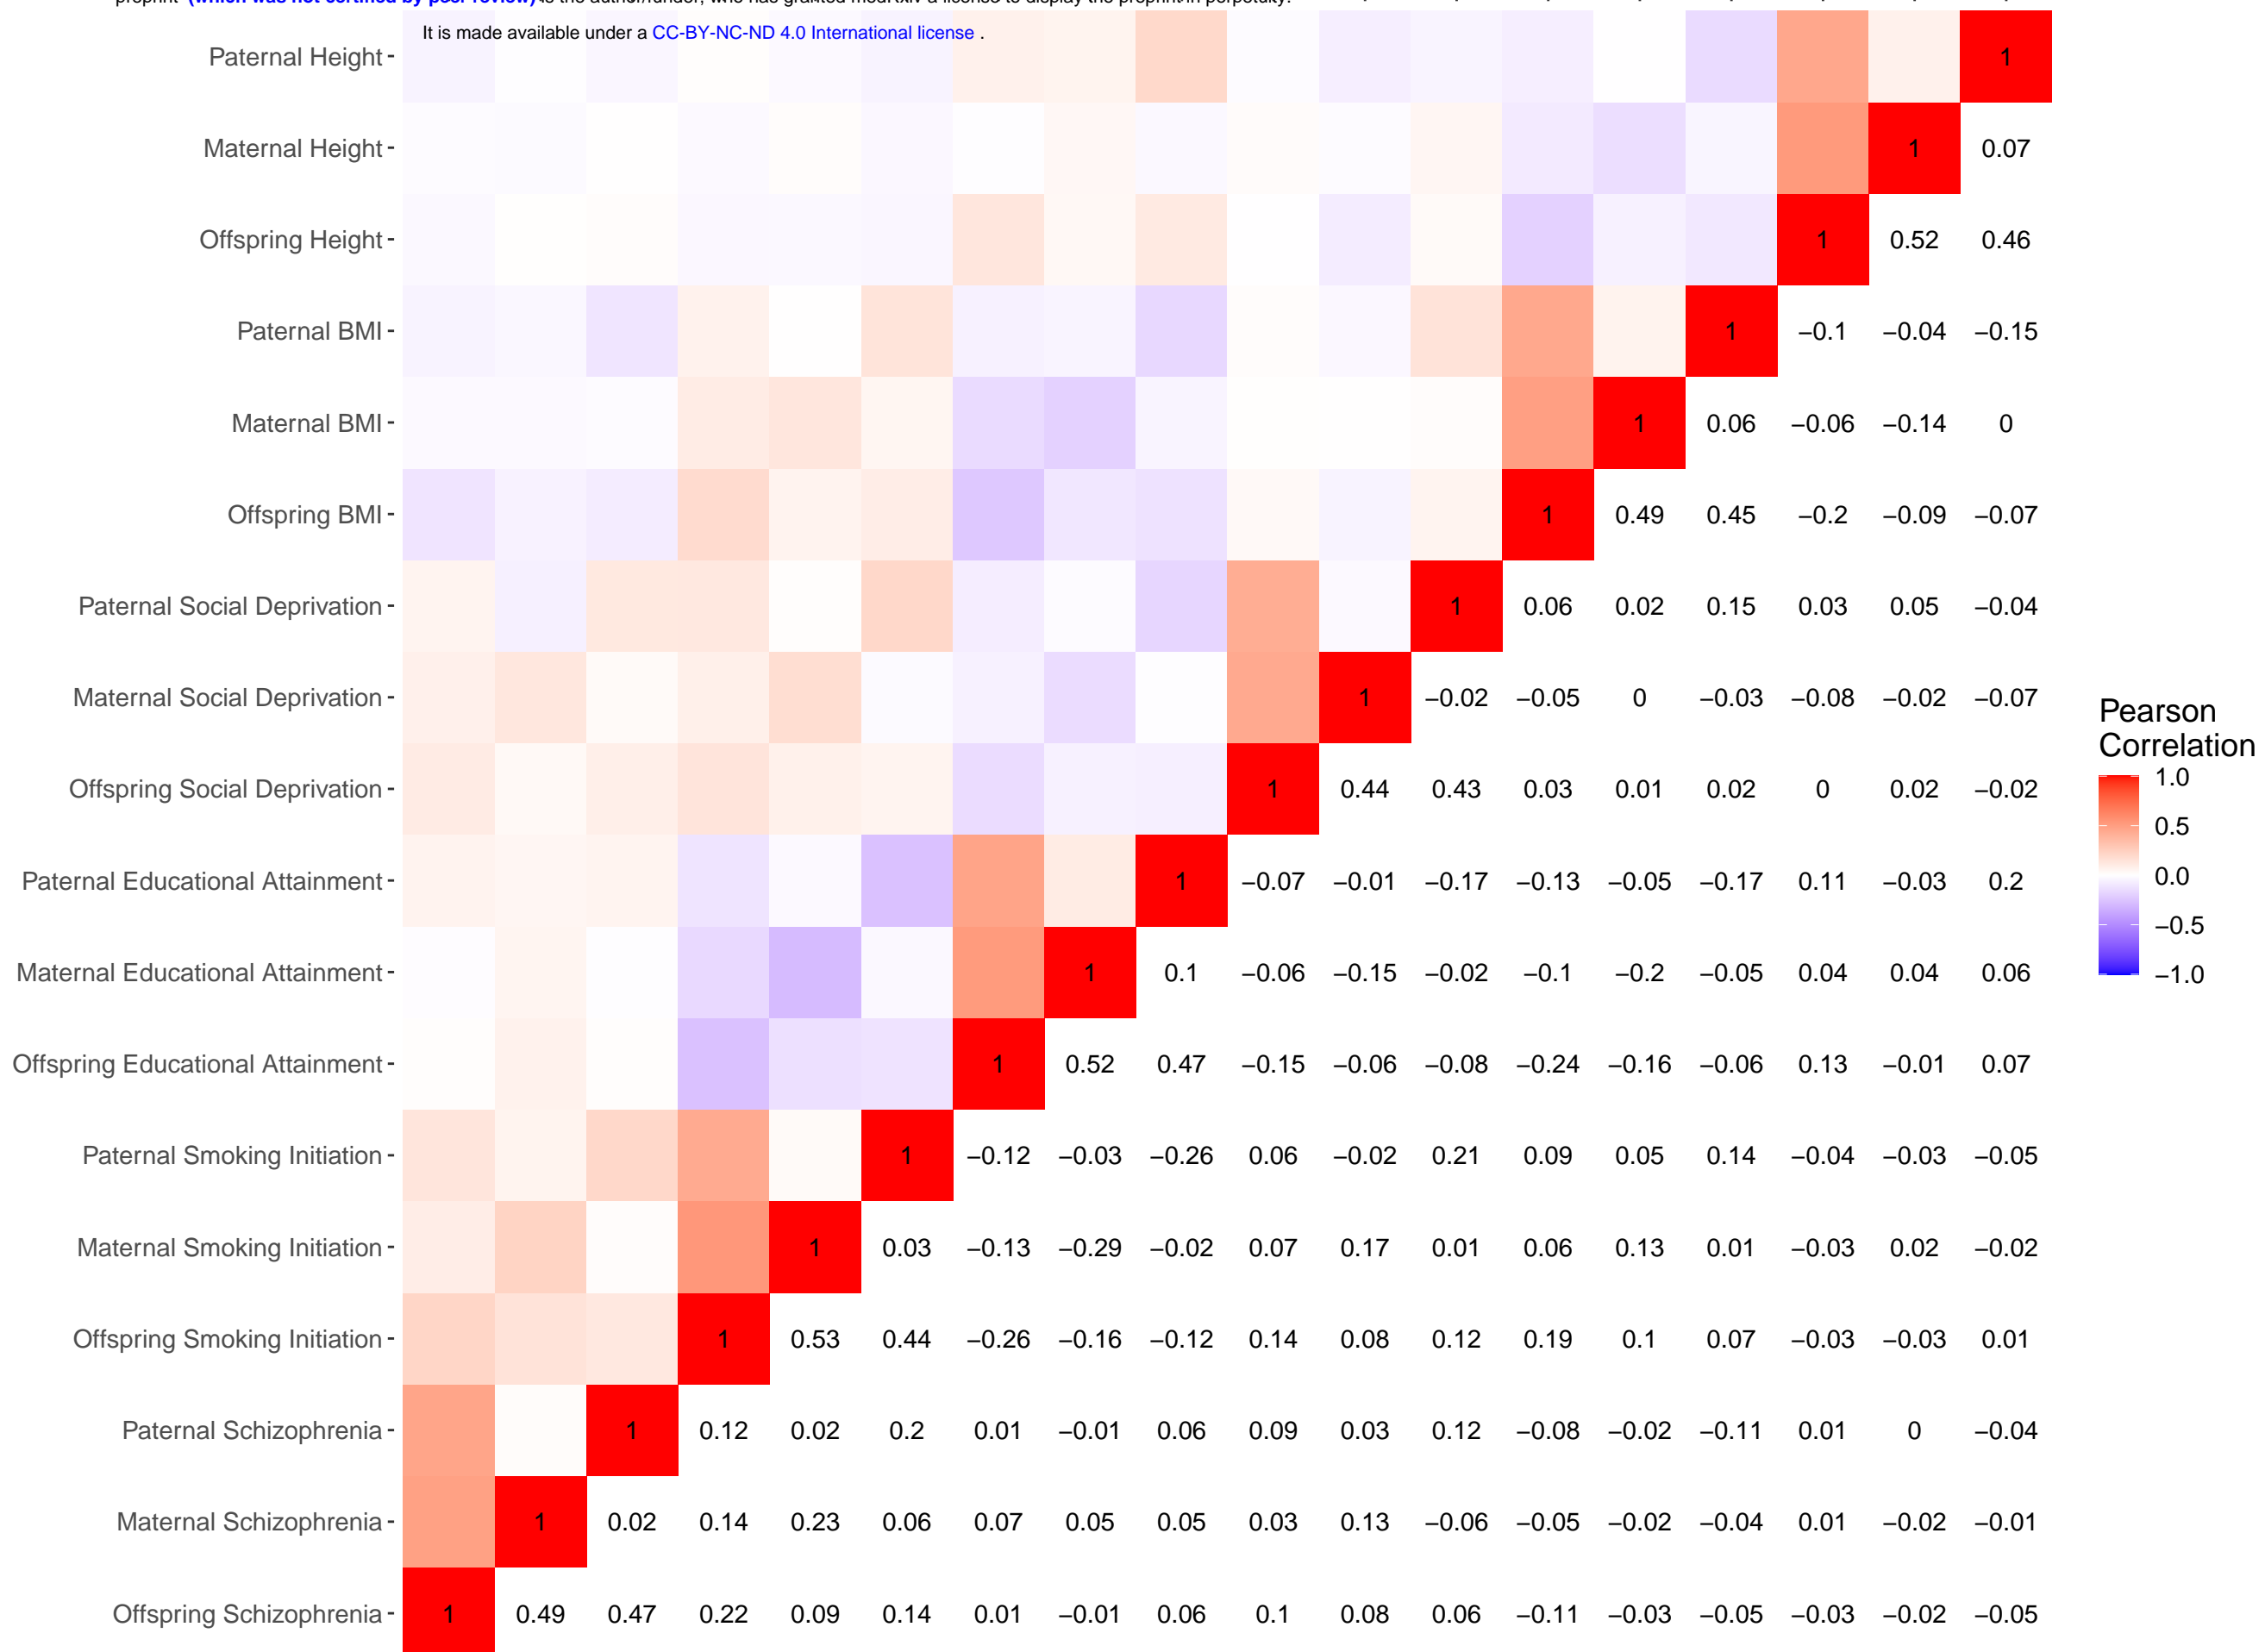



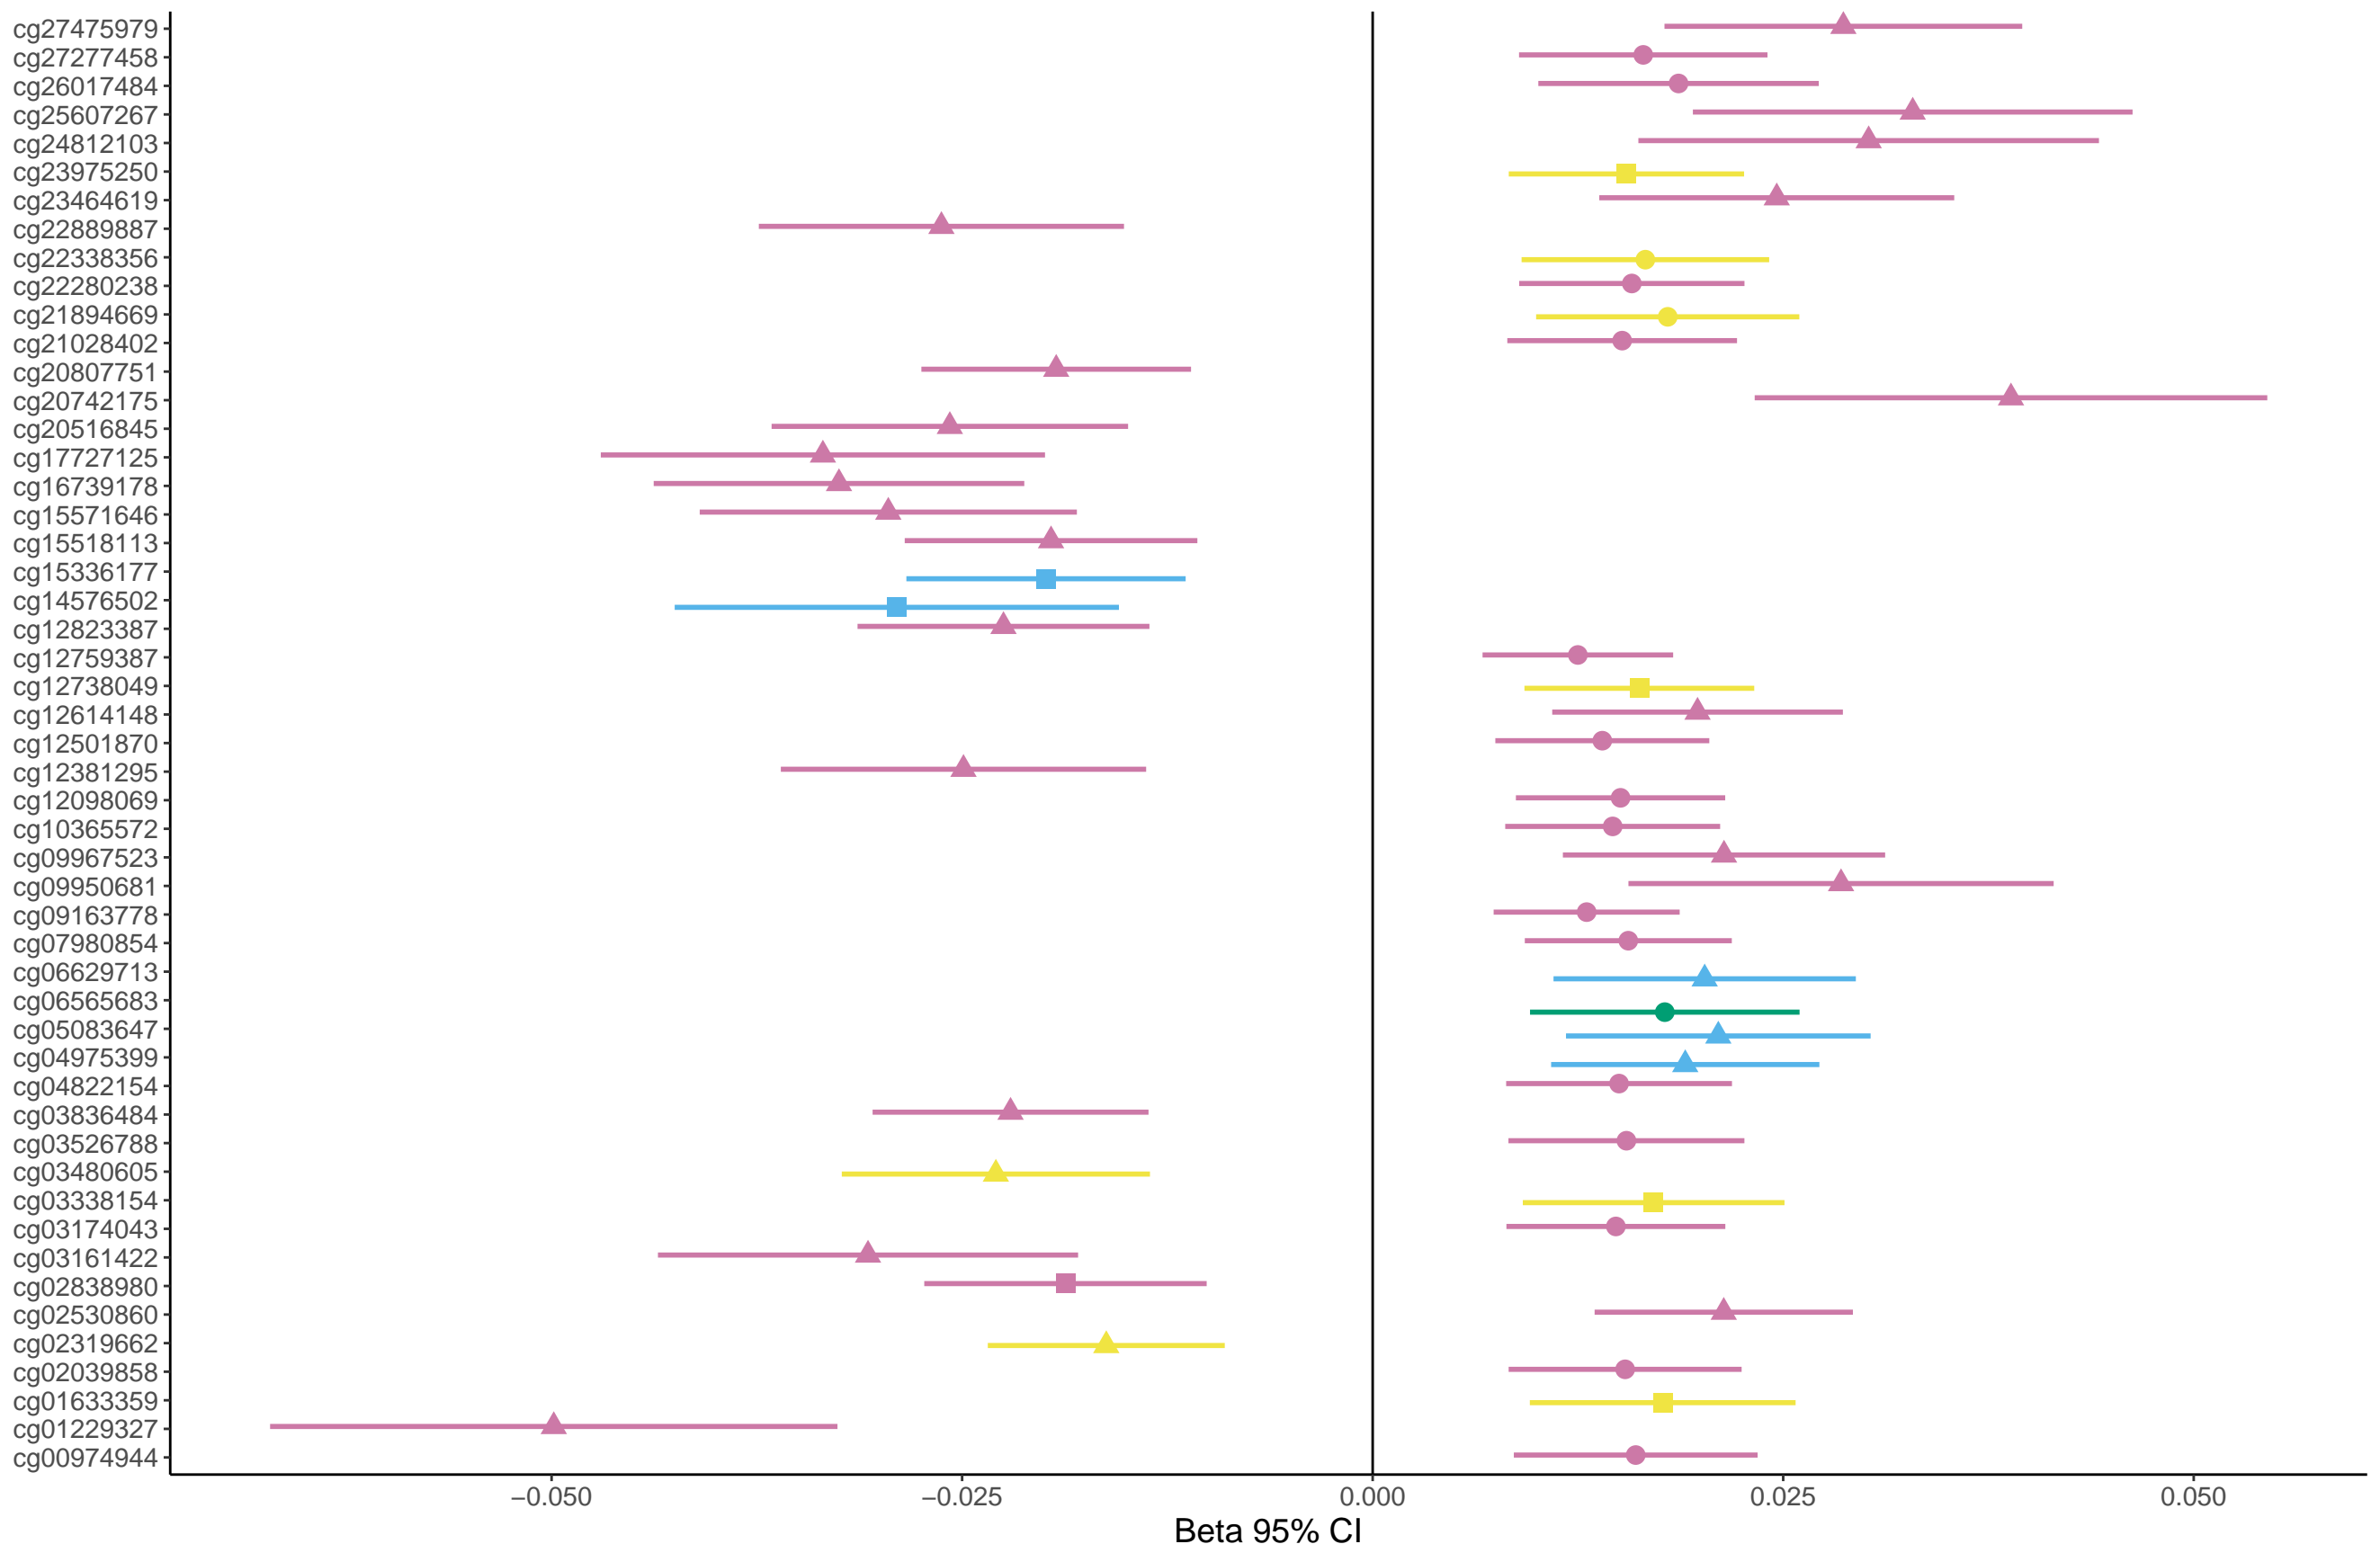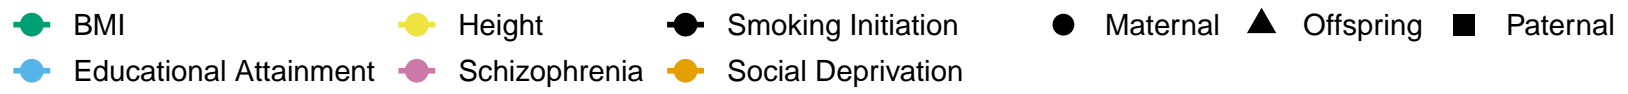

Source: https://medrxiv.org/content/10.1101/2024.04.15.24305824v2.full.pdf
